# Supplementary material for: Transcriptomic and Metabolomic Profile Analysis of Muscles Reveals Pathways and Biomarkers Involved in Flavor Differences between Caged and Cage-Free Chickens
Source: MDPI journal article supplement (doi:10.3390/foods11182890), 2022-09-17
Supplement: s1 [file s1]

TableS1. Primer information for qPCR verification

| Primer   | Sequence              |
|----------|-----------------------|
| GAPDH-F  | CCCCCATGTTTGTGATGGGT  |
| GAPDH-R  | TGATGGCATGGACAGTGGTC  |
| NR4A3-F  | AGACGCCGTAACAGATGTCA  |
| NR4A3-R  | TCGTGAATAGTCGAGCTCCC  |
| FABP3-F  | CCGGCCTGACCAAACCC     |
| FABP3-R  | TGCCTCCATCTAGCTTGACCA |
| GLS2-F   | TTCCTAATGTCATGGGCTTG  |
| GLS2-R   | CTTGACCCGCTGATCACCA   |
| COL3A1-F | CTTACCCGGTAGCAACGGACT |
| COL3A1-R | CTGGGCCTCCATCTTGACCAC |
| FBN1-F   | TCTTTCCGCTGTGAATGTCC  |
| FBN1-R   | CACTACATTCCTGCAAGTTCC |
