# Supplementary material for: Transcriptomic and Metabolomic Profile Analysis of Muscles Reveals Pathways and Biomarkers Involved in Flavor Differences between Caged and Cage-Free Chickens
Source: MDPI journal article supplement (doi:10.3390/foods11182890), 2022-09-17
Supplement: s1 [file s1]

Table S1. Linear regression analysis between age, sex, rearing systems and breast muscle aroma intensity (n=82)

|          | Unstandardized Coefficients |                | Standardized Coefficients | <i>t</i> | <i>p</i> | VIF   | <i>R</i> <sup>2</sup> | Adjusted R <sup>2</sup> | <i>F</i>                               |
|----------|-----------------------------|----------------|---------------------------|----------|----------|-------|-----------------------|-------------------------|----------------------------------------|
|          | <i>B</i>                    | Standard error | <i>Beta</i>               |          |          |       |                       |                         |                                        |
| Constant | 4.532                       | 0.901          | -                         | 5.027    | 0.000**  | -     |                       |                         |                                        |
| Age      | -0.000                      | 0.031          | -0.001                    | -0.005   | 0.996    | 1.056 | 0.016                 | -0.022                  | <i>F</i> (3,78)=0.431, <i>p</i> =0.731 |
| SEX      | -0.152                      | 0.238          | -0.074                    | -0.640   | 0.524    | 1.056 |                       |                         |                                        |
| SYS      | -0.195                      | 0.210          | -0.104                    | -0.927   | 0.357    | 1.000 |                       |                         |                                        |

Dependent variable: Aroma intensity; D-W value:2.034; \*P<0.05; \*\* P<0.01.

Table S2. Linear regression analysis between age, sex, rearing systems and breast muscle initial impression of juiciness (n=82)

|          | Unstandardized Coefficients |                | Standardized Coefficients | <i>t</i> | <i>p</i> | VIF   | <i>R</i> <sup>2</sup> | Adjusted R <sup>2</sup> | <i>F</i>                               |
|----------|-----------------------------|----------------|---------------------------|----------|----------|-------|-----------------------|-------------------------|----------------------------------------|
|          | <i>B</i>                    | Standard error | <i>Beta</i>               |          |          |       |                       |                         |                                        |
| Constant | 3.910                       | 0.741          | -                         | 5.276    | 0.000**  | -     |                       |                         |                                        |
| Age      | -0.024                      | 0.026          | -0.107                    | -0.922   | 0.359    | 1.056 | 0.013                 | -0.025                  | <i>F</i> (3,78)=0.331, <i>p</i> =0.803 |
| SEX      | -0.006                      | 0.195          | -0.003                    | -0.030   | 0.976    | 1.056 |                       |                         |                                        |
| SYS      | 0.049                       | 0.173          | 0.032                     | 0.282    | 0.779    | 1.000 |                       |                         |                                        |

Dependent variable: Initial impression of juiciness; D-W value:1.590; \*P<0.05; \*\* P<0.01.

Table S3. Linear regression analysis between age, sex, rearing systems and breast muscle first bite (n=82)

|          | Unstandardized Coefficients |                | Standardized Coefficients | <i>t</i> | <i>p</i> | VIF   | <i>R</i> <sup>2</sup> | Adjusted R <sup>2</sup> | <i>F</i>                               |
|----------|-----------------------------|----------------|---------------------------|----------|----------|-------|-----------------------|-------------------------|----------------------------------------|
|          | <i>B</i>                    | Standard error | <i>Beta</i>               |          |          |       |                       |                         |                                        |
| Constant | 3.905                       | 0.743          | -                         | 5.257    | 0.000**  | -     |                       |                         |                                        |
| Age      | -0.007                      | 0.026          | -0.030                    | -0.264   | 0.792    | 1.056 | 0.031                 | -0.006                  | <i>F</i> (3,78)=0.845, <i>p</i> =0.473 |
| SEX      | -0.038                      | 0.196          | -0.022                    | -0.196   | 0.845    | 1.056 |                       |                         |                                        |
| SYS      | -0.268                      | 0.173          | -0.172                    | -1.548   | 0.126    | 1.000 |                       |                         |                                        |

Dependent variable: First bite ; D-W value:2.215; \*P<0.05; \*\* P<0.01.

Table S4. Linear regression analysis between age, sex, rearing systems and breast muscle sustained impression of juiciness (n=82)

|          | Unstandardized Coefficients |                | Standardized Coefficients | <i>t</i> | <i>p</i> | VIF   | <i>R</i> <sup>2</sup> | Adjusted R <sup>2</sup> | <i>F</i>                               |
|----------|-----------------------------|----------------|---------------------------|----------|----------|-------|-----------------------|-------------------------|----------------------------------------|
|          | <i>B</i>                    | Standard error | <i>Beta</i>               |          |          |       |                       |                         |                                        |
| Constant | 2.874                       | 0.704          | -                         | 4.083    | 0.000**  | -     |                       |                         |                                        |
| Age      | 0.035                       | 0.024          | 0.163                     | 1.431    | 0.157    | 1.056 | 0.047                 | 0.010                   | <i>F</i> (3,78)=1.278, <i>p</i> =0.288 |
| SEX      | -0.057                      | 0.186          | -0.035                    | -0.307   | 0.760    | 1.056 |                       |                         |                                        |
| SYS      | -0.220                      | 0.164          | -0.148                    | -1.336   | 0.185    | 1.000 |                       |                         |                                        |

Dependent variable: sustained impression of juiciness ; D-W value:2.282; \*P<0.05; \*\* P<0.01.

Table S5. Linear regression analysis between age, sex, rearing systems and breast muscle fiber and overall tenderness (n=82)

|          | Unstandardized Coefficients |                | Standardized Coefficients | <i>t</i> | <i>p</i> | VIF   | <i>R</i> <sup>2</sup> | Adjusted R <sup>2</sup> | <i>F</i>                               |
|----------|-----------------------------|----------------|---------------------------|----------|----------|-------|-----------------------|-------------------------|----------------------------------------|
|          | <i>B</i>                    | Standard error | <i>Beta</i>               |          |          |       |                       |                         |                                        |
| Constant | 5.785                       | 0.673          | -                         | 8.591    | 0.000**  | -     |                       |                         |                                        |
| Age      | -0.035                      | 0.023          | -0.165                    | -1.493   | 0.140    | 1.056 | 0.093                 | 0.058                   | <i>F</i> (3,78)=2.654, <i>p</i> =0.054 |
| SEX      | 0.284                       | 0.177          | 0.177                     | 1.599    | 0.114    | 1.056 |                       |                         |                                        |
| SYS      | -0.317                      | 0.157          | -0.218                    | -2.018   | 0.047*   | 1.000 |                       |                         |                                        |

Dependent variable: Muscle fiber and overall tenderness; D-W value:1.854 ; \*P<0.05; \*\* P<0.01.

Table S6. Linear regression analysis between age, sex, rearing systems and breast muscle amount of connective tissue(n=82)

|          | Unstandardized Coefficients |                | Standardized Coefficients | <i>t</i> | <i>p</i> | VIF   | <i>R</i> <sup>2</sup> | Adjusted R <sup>2</sup> | <i>F</i>                               |
|----------|-----------------------------|----------------|---------------------------|----------|----------|-------|-----------------------|-------------------------|----------------------------------------|
|          | <i>B</i>                    | Standard error | <i>Beta</i>               |          |          |       |                       |                         |                                        |
| Constant | 1.190                       | 0.381          | -                         | 3.123    | 0.003**  | -     |                       |                         |                                        |
| Age      | 0.004                       | 0.013          | 0.031                     | 0.266    | 0.791    | 1.056 | 0.018                 | -0.020                  | <i>F</i> (3,78)=0.481, <i>p</i> =0.696 |
| SEX      | 0.034                       | 0.100          | 0.039                     | 0.339    | 0.735    | 1.056 |                       |                         |                                        |
| SYS      | -0.098                      | 0.089          | -0.123                    | -1.097   | 0.276    | 1.000 |                       |                         |                                        |

Dependent variable: Amount of connective tissue; D-W value:2.062 ; \*P<0.05; \*\* P<0.01.

Table S7. Linear regression analysis between age, sex, rearing systems and breast muscle overall flavor intensity (n=82)

|          | Unstandardized Coefficients |                | Standardized Coefficients |        | <i>t</i> | <i>p</i> | VIF   | <i>R</i> <sup>2</sup> | Adjusted R <sup>2</sup> | <i>F</i>                               |
|----------|-----------------------------|----------------|---------------------------|--------|----------|----------|-------|-----------------------|-------------------------|----------------------------------------|
|          | <i>B</i>                    | Standard error | <i>Beta</i>               |        |          |          |       |                       |                         |                                        |
| Constant | 4.234                       | 0.792          | -                         | 5.344  | 0.000**  | -        |       |                       |                         |                                        |
| Age      | -0.013                      | 0.027          | -0.055                    | -0.476 | 0.635    | 1.056    | 0.019 | -0.019                |                         | <i>F</i> (3,78)=0.503, <i>p</i> =0.681 |
| SEX      | 0.238                       | 0.209          | 0.132                     | 1.142  | 0.257    | 1.056    |       |                       |                         |                                        |
| SYS      | 0.073                       | 0.185          | 0.044                     | 0.396  | 0.693    | 1.000    |       |                       |                         |                                        |

Dependent variable: overall flavor intensity ; D-W value:2.322; \*P<0.05; \*\* P<0.01.

Table S8. Linear regression analysis between age, sex, rearing systems and breast muscle overall off-flavor intensity (n=82)

|          | Unstandardized Coefficients |                | Standardized Coefficients |        | <i>t</i> | <i>p</i> | VIF   | <i>R</i> <sup>2</sup> | Adjusted R <sup>2</sup> | <i>F</i>                               |
|----------|-----------------------------|----------------|---------------------------|--------|----------|----------|-------|-----------------------|-------------------------|----------------------------------------|
|          | <i>B</i>                    | Standard error | <i>Beta</i>               |        |          |          |       |                       |                         |                                        |
| Constant | 3.261                       | 0.674          | -                         | 4.839  | 0.000**  | -        |       |                       |                         |                                        |
| Age      | -0.021                      | 0.023          | -0.102                    | -0.902 | 0.370    | 1.056    | 0.046 | 0.010                 |                         | <i>F</i> (3,78)=1.263, <i>p</i> =0.293 |
| SEX      | -0.138                      | 0.178          | -0.088                    | -0.779 | 0.439    | 1.056    |       |                       |                         |                                        |
| SYS      | 0.220                       | 0.157          | 0.154                     | 1.396  | 0.167    | 1.000    |       |                       |                         |                                        |

Dependent variable: overall off-flavor intensity ; D-W value:2.310; \*P<0.05; \*\* P<0.01.

Table S9. Linear regression analysis between age, sex, rearing systems and leg muscle aroma intensity (n=82)

|          | Unstandardized Coefficients |                | Standardized Coefficients | <i>t</i> | <i>p</i> | VIF   | <i>R</i> <sup>2</sup> | Adjusted R <sup>2</sup> | <i>F</i>                               |
|----------|-----------------------------|----------------|---------------------------|----------|----------|-------|-----------------------|-------------------------|----------------------------------------|
|          | <i>B</i>                    | Standard error | <i>Beta</i>               |          |          |       |                       |                         |                                        |
| Constant | 5.729                       | 0.786          | -                         | 7.290    | 0.000**  | -     |                       |                         |                                        |
| SEX      | -0.167                      | 0.207          | -0.091                    | -0.807   | 0.422    | 1.056 | 0.056                 | 0.020                   | <i>F</i> (3,78)=1.544, <i>p</i> =0.210 |
| Age      | 0.004                       | 0.027          | 0.018                     | 0.162    | 0.872    | 1.056 |                       |                         |                                        |
| SYS      | -0.366                      | 0.183          | -0.219                    | -1.995   | 0.050*   | 1.000 |                       |                         |                                        |

Dependent variable: Aroma intensity; D-W value:1. 426; \*P<0.05; \*\* P<0.01.

Table S10. Linear regression analysis between age, sex, rearing systems and leg muscle initial impression of juiciness (n=82)

|          | Unstandardized Coefficients |                | Standardized Coefficients | <i>t</i> | <i>p</i> | VIF   | <i>R</i> <sup>2</sup> | Adjusted R <sup>2</sup> | <i>F</i>                               |
|----------|-----------------------------|----------------|---------------------------|----------|----------|-------|-----------------------|-------------------------|----------------------------------------|
|          | <i>B</i>                    | Standard error | <i>Beta</i>               |          |          |       |                       |                         |                                        |
| Constant | 5.085                       | 0.812          | -                         | 6.265    | 0.000**  | -     |                       |                         |                                        |
| SEX      | -0.247                      | 0.214          | -0.132                    | -1.156   | 0.251    | 1.056 | 0.044                 | 0.007                   | <i>F</i> (3,78)=1.191, <i>p</i> =0.319 |
| Age      | -0.006                      | 0.028          | -0.023                    | -0.201   | 0.841    | 1.056 |                       |                         |                                        |
| SYS      | -0.268                      | 0.189          | -0.157                    | -1.416   | 0.161    | 1.000 |                       |                         |                                        |

Dependent variable: Initial impression of juiciness; D-W value:1.620; \*P<0.05; \*\* P<0.01.

Table S11. Linear regression analysis between age, sex, rearing systems and leg muscle first bite (n=82)

|          | Unstandardized Coefficients |                | Standardized Coefficients | <i>t</i> | <i>p</i> | VIF   | <i>R</i> <sup>2</sup> | Adjusted R <sup>2</sup> | <i>F</i>                               |
|----------|-----------------------------|----------------|---------------------------|----------|----------|-------|-----------------------|-------------------------|----------------------------------------|
|          | <i>B</i>                    | Standard error | <i>Beta</i>               |          |          |       |                       |                         |                                        |
| Constant | 3.856                       | 0.908          | -                         | 4.246    | 0.000**  | -     |                       |                         |                                        |
| SEX      | 0.016                       | 0.239          | 0.008                     | 0.068    | 0.946    | 1.056 | 0.009                 | -0.029                  | <i>F</i> (3,78)=0.240, <i>p</i> =0.868 |
| Age      | 0.014                       | 0.031          | 0.053                     | 0.458    | 0.648    | 1.056 |                       |                         |                                        |
| SYS      | 0.146                       | 0.212          | 0.078                     | 0.690    | 0.492    | 1.000 |                       |                         |                                        |

Dependent variable: First bite ; D-W value:2.215; \*P<0.05; \*\* P<0.01.

Table S12. Linear regression analysis between age, sex, rearing systems and leg muscle sustained impression of juiciness (n=82)

|          | Unstandardized Coefficients |                | Standardized Coefficients | <i>t</i> | <i>p</i> | VIF   | <i>R</i> <sup>2</sup> | Adjusted R <sup>2</sup> | <i>F</i>                               |
|----------|-----------------------------|----------------|---------------------------|----------|----------|-------|-----------------------|-------------------------|----------------------------------------|
|          | <i>B</i>                    | Standard error | <i>Beta</i>               |          |          |       |                       |                         |                                        |
| Constant | 5.719                       | 0.676          | -                         | 8.460    | 0.000**  | -     |                       |                         |                                        |
| SEX      | 0.102                       | 0.178          | 0.064                     | 0.573    | 0.568    | 1.056 | 0.080                 | 0.045                   | <i>F</i> (3,78)=2.272, <i>p</i> =0.087 |
| Age      | -0.027                      | 0.023          | -0.129                    | -1.157   | 0.251    | 1.056 |                       |                         |                                        |
| SYS      | -0.366                      | 0.158          | -0.252                    | -2.319   | 0.023*   | 1.000 |                       |                         |                                        |

Dependent variable: sustained impression of juiciness ; D-W value:1.911 ; \*P<0.05; \*\* P<0.01.

Table S13. Linear regression analysis between age, sex, rearing systems and leg muscle fiber and overall tenderness (n=82)

|          | Unstandardized Coefficients |                | Standardized Coefficients | <i>t</i> | <i>p</i> | VIF   | <i>R</i> <sup>2</sup> | Adjusted R <sup>2</sup> | <i>F</i>                               |
|----------|-----------------------------|----------------|---------------------------|----------|----------|-------|-----------------------|-------------------------|----------------------------------------|
|          | <i>B</i>                    | Standard error | <i>Beta</i>               |          |          |       |                       |                         |                                        |
| Constant | 4.570                       | 0.933          | -                         | 4.901    | 0.000**  | -     |                       |                         |                                        |
| SEX      | 0.029                       | 0.246          | 0.014                     | 0.118    | 0.906    | 1.056 | 0.006                 | -0.032                  | <i>F</i> (3,78)=0.157, <i>p</i> =0.925 |
| Age      | 0.001                       | 0.032          | 0.005                     | 0.045    | 0.964    | 1.056 |                       |                         |                                        |
| SYS      | -0.146                      | 0.218          | -0.076                    | -0.672   | 0.503    | 1.000 |                       |                         |                                        |

Dependent variable: Muscle fiber and overall tenderness; D-W value:1.877 ; \*P<0.05; \*\* P<0.01.

Table S14. Linear regression analysis between age, sex, rearing systems and leg muscle amount of connective tissue(n=82)

|          | Unstandardized Coefficients |                | Standardized Coefficients | <i>t</i> | <i>p</i> | VIF   | <i>R</i> <sup>2</sup> | Adjusted R <sup>2</sup> | <i>F</i>                               |
|----------|-----------------------------|----------------|---------------------------|----------|----------|-------|-----------------------|-------------------------|----------------------------------------|
|          | <i>B</i>                    | Standard error | <i>Beta</i>               |          |          |       |                       |                         |                                        |
| Constant | 1.019                       | 0.583          | -                         | 1.747    | 0.085    | -     |                       |                         |                                        |
| SEX      | 0.027                       | 0.154          | 0.020                     | 0.177    | 0.860    | 1.056 | 0.017                 | -0.021                  | <i>F</i> (3,78)=0.445, <i>p</i> =0.721 |
| Age      | 0.021                       | 0.020          | 0.122                     | 1.057    | 0.294    | 1.056 |                       |                         |                                        |
| SYS      | 0.024                       | 0.136          | 0.020                     | 0.179    | 0.858    | 1.000 |                       |                         |                                        |

Dependent variable: Amount of connective tissue; D-W value:1.955 ; \*P<0.05; \*\* P<0.01.

Table S15. Linear regression analysis between age, sex, rearing systems and leg muscle overall flavor intensity (n=82)

|          | Unstandardized Coefficients |                | Standardized Coefficients | <i>t</i> | <i>p</i> | VIF   | <i>R</i> <sup>2</sup> | Adjusted R <sup>2</sup> | <i>F</i>                               |
|----------|-----------------------------|----------------|---------------------------|----------|----------|-------|-----------------------|-------------------------|----------------------------------------|
|          | <i>B</i>                    | Standard error | <i>Beta</i>               |          |          |       |                       |                         |                                        |
| Constant | 7.050                       | 0.815          | -                         | 8.652    | 0.000**  | -     |                       |                         |                                        |
| SEX      | -0.459                      | 0.215          | -0.233                    | -2.138   | 0.036*   | 1.056 | 0.123                 | 0.089                   | <i>F</i> (3,78)=3.648, <i>p</i> =0.016 |
| Age      | -0.026                      | 0.028          | -0.102                    | -0.937   | 0.352    | 1.056 |                       |                         |                                        |
| SYS      | -0.390                      | 0.190          | -0.218                    | -2.052   | 0.044*   | 1.000 |                       |                         |                                        |

Dependent variable: overall flavor intensity ; D-W value:2.301; \*P<0.05; \*\* P<0.01.

Table S16. Linear regression analysis between age, sex, rearing systems and leg muscle overall off-flavor intensity (n=82)

|          | Unstandardized Coefficients |                | Standardized Coefficients | <i>t</i> | <i>p</i> | VIF   | <i>R</i> <sup>2</sup> | Adjusted R <sup>2</sup> | <i>F</i>                               |
|----------|-----------------------------|----------------|---------------------------|----------|----------|-------|-----------------------|-------------------------|----------------------------------------|
|          | <i>B</i>                    | Standard error | <i>Beta</i>               |          |          |       |                       |                         |                                        |
| Constant | 2.349                       | 0.785          | -                         | 2.992    | 0.004**  | -     |                       |                         |                                        |
| SEX      | 0.164                       | 0.207          | 0.091                     | 0.791    | 0.431    | 1.056 | 0.019                 | -0.019                  | <i>F</i> (3,78)=0.505, <i>p</i> =0.680 |
| Age      | -0.009                      | 0.027          | -0.038                    | -0.329   | 0.743    | 1.056 |                       |                         |                                        |
| SYS      | 0.171                       | 0.183          | 0.104                     | 0.932    | 0.354    | 1.000 |                       |                         |                                        |

Dependent variable: overall off-flavor intensity ; D-W value:1.703; \*P<0.05; \*\* P<0.01.
