# Supplementary material for: Transcriptomic and Metabolomic Profile Analysis of Muscles Reveals Pathways and Biomarkers Involved in Flavor Differences between Caged and Cage-Free Chickens
Source: MDPI journal article supplement (doi:10.3390/foods11182890), 2022-09-17
Supplement: s1 [file s1]

Archive with 4 entries (4 files):
- Supplementary file S1ú║Primer information.pdf
- Supplementary file S2. Data analysis of sensory evaluation..pdf
- Supplementary file S3ú║Differential Expressed Genes.xlsx
- Supplementary file S4ú║Differential Metabolites.xlsx
