# Supplementary material for: Transcriptomic and Metabolomic Profile Analysis of Muscles Reveals Pathways and Biomarkers Involved in Flavor Differences between Caged and Cage-Free Chickens
Source: MDPI journal article supplement (doi:10.3390/foods11182890), 2022-09-17
Supplement: s1 [file s1 › Supplementary file S3ú║Differential Expressed Genes.xlsx]

## Sheet: Fr_vs_Ca_all_gene5vs5
	Gene name	log2FoldChange	pvalue	padj
ENSGALG00000000151	ADAMTS19	-1.43414	0.0153995	0.0822665
ENSGALG00000000168	ADORA1	1.05898	0.0189102	0.0945029
ENSGALG00000000172	MYOG	2.77981	2.50116e-07	3.25603e-05
ENSGALG00000000242	EBF2	-1.25009	0.00138268	0.0145163
ENSGALG00000000249	GH	1.2857	1.32427e-05	0.000510994
ENSGALG00000000255	MAN2A1	-1.05153	0.00129616	0.01378
ENSGALG00000000311	DOCK5	-1.18199	0.0464517	0.173476
ENSGALG00000000430	SPPL2C	-1.0111	1.83708e-06	0.000144137
ENSGALG00000000461	MRC2	-1.26367	2.77538e-08	6.04878e-06
ENSGALG00000000511	KCTD20	-2.15795	0.000111309	0.00233401
ENSGALG00000000560		-1.09231	0.00378324	0.0299227
ENSGALG00000000652	ACOT7	1.00939	5.90203e-06	0.000312887
ENSGALG00000000871	ART1	1.18037	0.000422401	0.00616014
ENSGALG00000000920	CGN	1.95025	0.0105614	NA
ENSGALG00000001084	ATP8B3	1.1471	0.0354246	0.14511
ENSGALG00000001130	GALNT17	-2.59018	6.83914e-07	6.87948e-05
ENSGALG00000001183	MYH10	-1.08375	4.93161e-05	0.00129572
ENSGALG00000001244		-3.90816	0.0378835	NA
ENSGALG00000001341	ZBTB44	-1.07483	5.46823e-05	0.00140208
ENSGALG00000001343	LAMB3	3.25072	0.0252111	NA
ENSGALG00000001348	TEKT3	2.61682	0.0300137	NA
ENSGALG00000001370	ADAMTS8	-1.3209	0.000470972	0.00662647
ENSGALG00000001389		-1.09212	1.30872e-05	0.000510994
ENSGALG00000001410	SPNS3	-1.49506	0.0416246	NA
ENSGALG00000001420	RALGAPB	-1.13698	3.58683e-06	0.000223351
ENSGALG00000001491	NCAPD3	-2.53103	7.29153e-05	0.00170604
ENSGALG00000001512	KCND3	1.75561	0.0370109	0.149376
ENSGALG00000001583	TRAF1	-1.53873	0.000103669	0.00224692
ENSGALG00000001605	PPM1J	-1.05859	3.95465e-05	0.0011215
ENSGALG00000001617	CAMKK1	-1.63623	0.0233117	0.108355
ENSGALG00000001709	MUSTN1	-1.99289	4.38526e-09	1.51794e-06
ENSGALG00000001892	CYGB	-1.37287	0.00143445	0.0147958
ENSGALG00000001912		1.56542	0.0212992	0.102453
ENSGALG00000001938	SLC25A24	-1.20462	4.08981e-06	0.00024433
ENSGALG00000001995	LIMS2	-1.19523	1.49671e-07	2.12227e-05
ENSGALG00000002000	GRAMD2A	1.14579	0.00135824	0.0143108
ENSGALG00000002033	NDUFB6	1.34815	3.32321e-11	3.91109e-08
ENSGALG00000002080	DOCK2	-1.32131	0.0117347	0.0682341
ENSGALG00000002124	ZDHHC8	-1.02901	0.00266726	0.0230308
ENSGALG00000002260	CISH	-1.64502	0.000101719	0.00222102
ENSGALG00000002371	RUSC2	-1.3093	2.09573e-05	0.000712852
ENSGALG00000002495	CHCHD2P9	1.08293	2.25787e-08	5.31457e-06
ENSGALG00000002506	SPSB1	-1.40115	8.06391e-06	0.000373638
ENSGALG00000002519	SLC25A33	-1.63825	0.000247255	0.00421317
ENSGALG00000002527		-1.10548	4.53332e-06	0.000261074
ENSGALG00000002555	RET	-2.1518	0.000217717	0.00385561
ENSGALG00000002557	ADGRD1	-1.64637	0.00519439	0.0378297
ENSGALG00000002618	KCTD7	1.99485	0.000373439	0.00561304
ENSGALG00000002710	IPMK	-1.18127	5.70373e-05	0.00143434
ENSGALG00000002726	KIF1B	-1.01677	1.88257e-06	0.000144201
ENSGALG00000002763	FRZB	-1.08896	3.97193e-05	0.00112191
ENSGALG00000002783	SLC43A2	-1.86393	0.000987026	0.0113997
ENSGALG00000002786	PSTPIP1	-1.59479	0.00247984	0.0218944
ENSGALG00000002846	NEURL1B	-1.20504	0.017444	0.0900238
ENSGALG00000003033	STXBP4	-1.70943	0.000245076	0.00418621
ENSGALG00000003058		1.59817	0.00419685	0.0323462
ENSGALG00000003076	FASLG	-1.68411	0.0420327	NA
ENSGALG00000003195	TRADD	-1.05571	0.0113141	0.0663789
ENSGALG00000003205	EIF4EBP1	1.09802	1.24584e-05	0.000502134
ENSGALG00000003295	ADAMTS12	-1.42141	0.000593101	0.00785484
ENSGALG00000003336	DAPK2	-1.05475	2.84123e-05	0.00089169
ENSGALG00000003403	ZNF385C	1.34181	0.00109224	0.0122755
ENSGALG00000003572	ARHGEF18	-1.33626	0.000352626	0.00537572
ENSGALG00000003578	FN1	-1.09028	8.70908e-06	0.000392709
ENSGALG00000003580	MMP2	-1.22926	1.08274e-08	3.26739e-06
ENSGALG00000003689	PAPSS2	-1.34354	0.000494437	0.00689458
ENSGALG00000003726	EGFLAM	-1.05897	2.34673e-06	0.000163403
ENSGALG00000003743	VPS37B	-1.12662	0.00485688	0.0360863
ENSGALG00000003775	RICTOR	-1.20263	0.00013897	0.00278226
ENSGALG00000003818	CYFIP2	-1.32675	0.021839	0.104016
ENSGALG00000003861		-1.28014	2.27005e-05	0.000761146
ENSGALG00000003879	MFSD2A	1.93014	3.07928e-06	0.000194839
ENSGALG00000003886	SGCD	-1.05418	0.000594873	0.00785484
ENSGALG00000003923	COL6A3	-1.00575	1.65293e-05	0.000594904
ENSGALG00000003925	MYPN	-1.14778	0.000385339	0.00574909
ENSGALG00000003973	TLCD1	1.19874	0.000432007	0.00622425
ENSGALG00000004037	DNA2	-2.19723	0.00722633	0.0485224
ENSGALG00000004044	CSRP3	-2.28794	0.00409133	0.0317827
ENSGALG00000004045	AGAP1	-1.06659	0.000164866	0.00315809
ENSGALG00000004071	NETO2	-1.70652	0.0232353	0.108128
ENSGALG00000004113		-1.16536	0.0405379	0.158713
ENSGALG00000004306	SYT12	1.40191	0.00612932	0.0426168
ENSGALG00000004370	MAP2K6	-1.19024	6.77275e-05	0.0016267
ENSGALG00000004397	MLXIP	-1.43811	8.86122e-11	8.02213e-08
ENSGALG00000004570	NCOA3	-1.11105	0.000180987	0.00337031
ENSGALG00000004593	SULF2	-1.26011	0.00124284	0.0133824
ENSGALG00000004597	ZBTB37	-1.2409	3.57515e-05	0.00104718
ENSGALG00000004613	P2RX5	-1.2088	0.0132697	0.0744028
ENSGALG00000004620	LAMC1	-1.16946	1.89501e-16	1.11512e-12
ENSGALG00000004621	PREX1	-1.15717	8.75236e-05	0.00198471
ENSGALG00000004695	ECM2	-1.10646	0.000174165	0.00328485
ENSGALG00000004740	TMOD2	-2.21992	0.0254151	NA
ENSGALG00000004809	PPIF	1.04739	8.02091e-05	0.00184732
ENSGALG00000004960	FBN1	-1.4641	4.1402e-08	7.85903e-06
ENSGALG00000005021	RAB43	-1.29197	3.30707e-05	0.000992114
ENSGALG00000005062	FOXN4	-3.22907	0.0460647	NA
ENSGALG00000005079	VCL	-1.86482	2.68031e-09	1.17989e-06
ENSGALG00000005102	CDH4	-1.17529	4.69666e-06	0.000261967
ENSGALG00000005120	FBLN2	-1.46195	3.77179e-09	1.46352e-06
ENSGALG00000005140	RRAD	-1.83396	0.0372225	0.149922
ENSGALG00000005207	SYNPO2L	-1.41787	2.26028e-06	0.000159019
ENSGALG00000005330	SNCAIP	1.13978	0.00707362	0.0477074
ENSGALG00000005350		-1.01495	0.00193404	0.0184454
ENSGALG00000005415	TEAD1	-1.22482	4.47278e-05	0.00121571
ENSGALG00000005421		1.53551	0.00228952	0.0206954
ENSGALG00000005458	RPL3L	1.06852	4.52324e-05	0.00122377
ENSGALG00000005473	PNAT3	-1.39064	0.00119832	0.0130222
ENSGALG00000005524	NTSR1	-2.5985	0.0140788	NA
ENSGALG00000005540	MICAL2	-1.36232	1.91442e-06	0.000144201
ENSGALG00000005547	PIK3AP1	-1.3388	0.0293896	0.127352
ENSGALG00000005572	NOXO1	-2.88375	0.00959956	NA
ENSGALG00000005648		-1.74136	0.000568798	0.00761568
ENSGALG00000005657	CRHR2	-1.09126	0.000200617	0.00363801
ENSGALG00000005662	AMPD3	-1.33878	0.00873521	0.0553814
ENSGALG00000005685		-1.23452	2.80712e-09	1.17989e-06
ENSGALG00000005716	SBF2	-1.03506	0.00454473	0.0343305
ENSGALG00000005809	SEPTIN2	-1.77038	0.00725218	0.0485224
ENSGALG00000005821	FAM219A	-1.25581	0.00267223	0.0230568
ENSGALG00000005923	NPY4R	-2.63509	0.0437642	NA
ENSGALG00000005974	COL6A1	-1.45619	1.33884e-08	3.84482e-06
ENSGALG00000006025	XIRP1	-2.10287	0.00125171	0.013441
ENSGALG00000006038	TGFBR3	-1.3829	9.24646e-05	0.00206885
ENSGALG00000006048		1.08265	0.00172493	0.0169173
ENSGALG00000006074	SOX6	-1.03951	0.0345047	0.14273
ENSGALG00000006112	SCN5A	-3.08343	0.0378239	NA
ENSGALG00000006165		-1.89636	0.0184109	NA
ENSGALG00000006194	SLC52A3	1.21451	0.0202667	0.0986736
ENSGALG00000006219	PRKAG2	1.10846	1.40103e-06	0.000122139
ENSGALG00000006325		-1.1695	0.0111286	0.0658151
ENSGALG00000006326	MIF	2.64169	0.0241283	NA
ENSGALG00000006425	SLC6A6	-1.05648	0.00188872	0.0181307
ENSGALG00000006522	HCK	1.22049	0.00831508	0.0536514
ENSGALG00000006562	MCF2	-1.28915	3.57691e-05	0.00104718
ENSGALG00000006563	SEMA3D	-1.46466	0.00104575	0.0119029
ENSGALG00000006567	UBASH3B	-1.56782	0.000156086	0.00303632
ENSGALG00000006638	GRIK4	-1.36141	0.0272227	0.120581
ENSGALG00000006689	ABHD2	-1.93311	0.00358385	0.0288044
ENSGALG00000006707	NOX1	1.3853	0.000274798	0.00451113
ENSGALG00000006776	KLHDC8B	1.01606	0.0081701	0.0528899
ENSGALG00000006779	PDZD3	1.08105	0.0418185	0.162187
ENSGALG00000006855	MELTF	1.01735	0.0207148	0.100202
ENSGALG00000006904	RNH1	-1.07063	0.000471268	0.00662647
ENSGALG00000006912	CPEB3	-1.00992	0.000262079	0.00439118
ENSGALG00000006922		1.29555	0.0331355	0.138632
ENSGALG00000006947	BDH1A	1.07404	0.000524527	0.00718644
ENSGALG00000006989		-3.28229	0.00182238	NA
ENSGALG00000006995	APOD	3.1452	4.33954e-09	1.51794e-06
ENSGALG00000007077	CPT1A	-2.19594	0.00110281	0.0123598
ENSGALG00000007205	COX6A1	1.01694	6.35975e-06	0.000331185
ENSGALG00000007248		-1.18554	8.56753e-05	0.00195409
ENSGALG00000007268		-2.2044	0.0391882	NA
ENSGALG00000007324	TP63	-1.67976	1.42865e-05	0.000538403
ENSGALG00000007489	CNNM1	1.03293	0.000536196	0.00728946
ENSGALG00000007546		-1.16944	0.01748	0.0900317
ENSGALG00000007766	KIAA1217	-2.27883	1.32297e-11	1.94626e-08
ENSGALG00000007777	SLC39A10	-1.53171	0.00061687	0.00803981
ENSGALG00000007786	DOK5	1.54087	3.23156e-08	6.55728e-06
ENSGALG00000007804	GXYLT2	-1.02669	0.00114023	0.0126187
ENSGALG00000007837	KAZALD1	1.68442	8.98669e-05	0.00202226
ENSGALG00000007920	PRR5L	-1.86878	0.000262299	0.00439118
ENSGALG00000007955	SLC16A5	1.02718	0.0483712	0.178123
ENSGALG00000008006	CAPN6	-1.26554	0.000895446	0.0106128
ENSGALG00000008076	TMEM164	-1.3867	0.000937069	0.0109517
ENSGALG00000008193	RELN	-1.54058	0.000424123	0.00616235
ENSGALG00000008267	IL5RA	2.89628	0.0290964	NA
ENSGALG00000008312	GSAP	-1.05706	0.00025996	0.00437067
ENSGALG00000008347	ATG13	-1.05391	4.18402e-09	1.51794e-06
ENSGALG00000008349	LMCD1	-1.51837	0.00173002	0.016939
ENSGALG00000008393	CREB3L1	-1.10837	0.0259775	0.11638
ENSGALG00000008398	MPP4	1.55247	7.53734e-05	0.0017462
ENSGALG00000008425	MAP1A	-1.55734	6.01066e-06	0.000315801
ENSGALG00000008428	CDK15	2.12027	0.0270991	NA
ENSGALG00000008479	PLEKHM3	-1.063	0.00125168	0.013441
ENSGALG00000008603	ITPKA	-1.20904	0.0146994	0.0798016
ENSGALG00000008656	ICOS	-1.24462	0.0144677	0.0792692
ENSGALG00000008666	CTLA4	-2.96182	0.0407156	NA
ENSGALG00000008823	IQUB	1.04361	0.00204817	0.0191461
ENSGALG00000008855	UGP2	1.03209	3.91855e-05	0.00111435
ENSGALG00000008905	HABP2	-1.3474	7.71566e-06	0.000362697
ENSGALG00000008914	NRAP	-1.95094	7.84661e-10	4.61734e-07
ENSGALG00000008916	DNAJB4	-1.26117	3.69474e-05	0.00107366
ENSGALG00000008940		1.14559	0.00494156	0.0365539
ENSGALG00000009052	LBH	1.99418	4.21251e-12	7.6261e-09
ENSGALG00000009062	CDK14	-1.82881	0.00196431	0.0186451
ENSGALG00000009078	GALNT14	1.27035	0.0290592	0.126432
ENSGALG00000009134	CTTNBP2	-1.38566	0.00131709	0.0139396
ENSGALG00000009222	FNDC3B	-1.10375	0.000252359	0.00427242
ENSGALG00000009249	UBR1	-1.05624	0.000119732	0.00245921
ENSGALG00000009279	SFMBT2	-1.10591	0.00998539	0.0608447
ENSGALG00000009303	ENAH	-1.43437	2.9262e-07	3.70306e-05
ENSGALG00000009341	CRAMP1	-1.01845	0.000135643	0.00273354
ENSGALG00000009381	SIPA1L1	-1.25667	1.32004e-05	0.000510994
ENSGALG00000009452	GALNT16	-1.23275	0.0321652	0.135682
ENSGALG00000009495	FGFR2	1.65535	0.0427304	0.164345
ENSGALG00000009626	THBS1	-1.16131	0.00196666	0.0186451
ENSGALG00000009641	COL1A2	-1.70268	1.32427e-07	1.92411e-05
ENSGALG00000009645	ESRRG	-1.17823	2.07742e-05	0.000708672
ENSGALG00000009650		-2.38763	1.10978e-12	2.61219e-09
ENSGALG00000009667	MFAP3L	2.806	0.0381337	NA
ENSGALG00000009700	PDK4	-3.95145	7.1179e-05	0.00168214
ENSGALG00000009732	PCDH18	-1.63987	1.52743e-06	0.000129326
ENSGALG00000009759	SLC16A7	1.74052	0.0083573	0.0537764
ENSGALG00000009784	PTPN14	-1.62071	1.14724e-05	0.000470448
ENSGALG00000009800	SETD7	-1.1457	1.21436e-05	0.000492822
ENSGALG00000009846	BBS5	-1.96302	0.000581258	0.0077385
ENSGALG00000009988	ELOVL1	-1.90153	4.12203e-06	0.000245011
ENSGALG00000009992	ARHGAP5	-1.03358	0.000674372	0.00855246
ENSGALG00000010036	FOSL2	-1.05134	0.0434278	0.16605
ENSGALG00000010090	FAM160A1	-1.43929	1.29051e-05	0.000510994
ENSGALG00000010169		-2.61153	0.000893229	NA
ENSGALG00000010179	RFX3	-2.05596	0.0112164	NA
ENSGALG00000010208	CAPS2	-4.09508	0.0196561	NA
ENSGALG00000010230	TESK2	-1.1992	0.000137162	0.00275942
ENSGALG00000010269	KCNAB1	-1.53686	0.00752147	0.0497305
ENSGALG00000010309	ZC2HC1C	-1.45757	0.0367255	NA
ENSGALG00000010314	NEK9	-1.01567	4.66097e-06	0.000261703
ENSGALG00000010323	BATF	1.15049	0.00584835	0.0412641
ENSGALG00000010346	TGFB3	-1.16018	1.61994e-05	0.00059025
ENSGALG00000010350	GPATCH2L	-1.18937	0.000165052	0.00315809
ENSGALG00000010371	FAM13A	-2.09297	0.000408184	0.00599581
ENSGALG00000010391	MMRN1	-1.70739	0.000188629	0.0034703
ENSGALG00000010448	LTBP1	-1.95257	2.8203e-06	0.00018303
ENSGALG00000010594	FEZ2	-1.00718	0.000296963	0.00474213
ENSGALG00000010623	ORC1	-1.50319	0.0208717	0.100822
ENSGALG00000010669	TDP1	-1.49806	0.00211676	0.0196468
ENSGALG00000010792	AGMO	-1.6612	0.0195151	0.0963796
ENSGALG00000010820	CHGA	-3.74792	0.00959903	NA
ENSGALG00000010836	AHR	-1.58636	1.92367e-06	0.000144201
ENSGALG00000010837	ASB5	-1.03958	0.00151395	0.0153999
ENSGALG00000010840	SNX13	-1.21627	8.07493e-07	7.60271e-05
ENSGALG00000011005	KCNK1	-2.14606	0.000440129	0.00628344
ENSGALG00000011058	LEPR	1.55306	0.00643752	0.0442542
ENSGALG00000011080	BDKRB2	-3.38218	0.0487235	NA
ENSGALG00000011084	CCSAP	-1.80014	0.00625371	0.0432325
ENSGALG00000011099	FAP	-1.25144	0.00268953	0.0231551
ENSGALG00000011145	TRIL	-1.29812	0.0104541	0.0629137
ENSGALG00000011170	WIPF3	-1.18049	5.17726e-07	5.4893e-05
ENSGALG00000011200	THBS2	-2.40973	5.30789e-09	1.68834e-06
ENSGALG00000011205	SMOC2	-1.05911	6.94169e-06	0.000346964
ENSGALG00000011226	ANKRD28	-1.27767	1.6969e-05	0.000602162
ENSGALG00000011285		-1.30276	1.31715e-05	0.000510994
ENSGALG00000011309	PLXNC1	-1.35982	0.0343855	0.142416
ENSGALG00000011329	AFDN	-1.16128	1.5394e-06	0.000129408
ENSGALG00000011342	FGD6	-1.51602	0.00213123	0.0197655
ENSGALG00000011366	MOK	2.82603	0.0336314	NA
ENSGALG00000011384	RCOR1	-1.10451	0.00369178	0.029377
ENSGALG00000011389	TRAF3	-2.22479	1.08292e-05	0.000448763
ENSGALG00000011456	CDK17	-1.06289	1.6021e-05	0.000587686
ENSGALG00000011524	PPEF2	1.84798	0.00820332	NA
ENSGALG00000011657	EAF2	-1.33124	0.00218929	0.0200577
ENSGALG00000011663	FNDC1	-2.07687	0.00507562	0.0371948
ENSGALG00000011740	MGP	-1.38273	2.84366e-06	0.00018303
ENSGALG00000011744	KALRN	-1.26072	0.000536382	0.00728946
ENSGALG00000011792		-1.92929	0.00971943	0.0595151
ENSGALG00000011856	FMC1	1.18613	7.02675e-10	4.35252e-07
ENSGALG00000011990	USP53	-1.10334	0.00142865	0.0147749
ENSGALG00000012013	SLC25A17	-1.09745	4.91479e-05	0.00129572
ENSGALG00000012076	TIFA	-2.45625	0.0015915	0.0159845
ENSGALG00000012177	NCKAP5	-1.22366	0.035264	0.144657
ENSGALG00000012187		-1.92121	0.000546901	0.00738129
ENSGALG00000012208	GMFB	-1.38886	0.00928683	0.0576459
ENSGALG00000012559	LARGE1	-1.32111	1.53788e-05	0.000572763
ENSGALG00000012709	ATXN1	-1.52638	0.000324552	0.00505245
ENSGALG00000012730	GFOD1	-1.21375	0.00280803	0.0239989
ENSGALG00000012802	F13A1	-1.40804	2.1871e-08	5.25306e-06
ENSGALG00000012877	CREB3L2	-1.14784	0.000364415	0.00551259
ENSGALG00000012994	ERC1	-1.06861	0.00178905	0.0173724
ENSGALG00000013063	SRD5A1	-2.69173	0.00387362	NA
ENSGALG00000013124	FHOD3	-1.4832	4.56439e-06	0.000261074
ENSGALG00000013134	PLEKHA5	-1.02202	0.000471909	0.00662756
ENSGALG00000013149	MOCOS	-1.00295	0.00230461	0.0207839
ENSGALG00000013209	SLC39A6	-1.62229	0.000338087	0.00518092
ENSGALG00000013377	LMBRD2	-1.09577	0.0213208	0.102453
ENSGALG00000013414	PDLIM3	-1.34972	5.10521e-09	1.66898e-06
ENSGALG00000013494	CENPN	-1.20783	0.00716455	0.0482628
ENSGALG00000013503	FAM149A	-2.12033	0.000299284	0.00476627
ENSGALG00000013568	NR4A3	1.82177	0.0288318	0.125814
ENSGALG00000013583	FAM114A1	-1.082	0.000114045	0.00236303
ENSGALG00000013617	PDGFRL	-1.09489	0.00195308	0.0185819
ENSGALG00000013642	KAZN	-1.26321	0.0243842	0.112013
ENSGALG00000013695	ZDHHC14	-1.00576	0.00223101	0.0202797
ENSGALG00000013754	PLAGL1	-1.1674	0.00202109	0.0189381
ENSGALG00000013784	CDT1	1.15315	0.00466783	0.0350803
ENSGALG00000013795	HIVEP2	-1.25307	1.07331e-09	5.7417e-07
ENSGALG00000013846	ARFGEF3	-1.8726	0.000147609	0.00289723
ENSGALG00000013929	PDGFRA	-1.60288	8.91592e-06	0.000393789
ENSGALG00000014038	CDC123	-1.26944	7.69043e-06	0.000362697
ENSGALG00000014069	TP53I11	-1.42088	4.74436e-06	0.000263379
ENSGALG00000014115	SLAIN2	-1.3937	6.91202e-07	6.89386e-05
ENSGALG00000014226	KIAA0930	-1.17501	2.57812e-05	0.000835866
ENSGALG00000014258		-1.18851	2.67574e-13	7.87269e-10
ENSGALG00000014346	TSPAN9	-1.04141	1.05637e-05	0.000442437
ENSGALG00000014516	CPEB2	-1.3203	0.0264463	0.117984
ENSGALG00000014569	PNPLA2	-1.3949	0.0232234	0.108115
ENSGALG00000014664	KIAA0825	-1.47547	0.0257784	0.115885
ENSGALG00000014699	MEGF10	-1.63146	0.00505949	0.0371461
ENSGALG00000014765	TRIM23	-1.04962	1.02019e-07	1.5593e-05
ENSGALG00000014784	MAST4	-1.28707	7.63093e-06	0.000362697
ENSGALG00000014819	JMY	-1.35658	0.000809022	0.00979566
ENSGALG00000014835	C7	-1.13557	0.00344159	0.0279146
ENSGALG00000014878	MAN1A1	-1.5407	0.000432472	0.00622425
ENSGALG00000014892	CEP85L	-1.60315	3.90697e-07	4.55258e-05
ENSGALG00000014907	DCBLD1	-1.56783	0.0351034	0.1442
ENSGALG00000014910	COLEC12	-1.05237	7.79536e-05	0.00179889
ENSGALG00000014914	SNX18	-1.05078	0.0193769	0.0960604
ENSGALG00000014957	WDR1	-1.27661	2.38854e-05	0.000789626
ENSGALG00000014999	MAP1B	-1.45929	0.0201665	0.0983587
ENSGALG00000015019		-1.24563	0.0303439	0.130192
ENSGALG00000015025	VANGL1	-1.03156	0.00531749	0.0385592
ENSGALG00000015034	ANKRD29	-1.45121	0.0121689	0.0701007
ENSGALG00000015040	SLC16A10	-1.35634	2.89579e-06	0.000184219
ENSGALG00000015051	CDK19	-1.2084	1.00214e-07	1.55187e-05
ENSGALG00000015075	B3GAT1L	-1.02249	0.0344489	0.142606
ENSGALG00000015084	IGSF11	-1.06084	0.0108517	0.0645314
ENSGALG00000015141	GDA	-3.87535	0.00931871	NA
ENSGALG00000015153	OPN5L1	3.1906	0.0403273	NA
ENSGALG00000015167	PRUNE2	-1.35991	0.0116277	0.0678126
ENSGALG00000015181	GAREM1	-1.59621	0.000163149	0.0031477
ENSGALG00000015193	CCDC80	-1.13059	0.000216068	0.00383546
ENSGALG00000015307		-1.2645	0.00294844	0.0249462
ENSGALG00000015363	HJURP	-2.54504	0.0390191	NA
ENSGALG00000015407	PLAG1	-1.22506	0.00115182	0.0127165
ENSGALG00000015436	SDCBP	-1.12021	0.000772906	0.00948522
ENSGALG00000015439	SLC44A1	-2.26222	4.53587e-12	7.6261e-09
ENSGALG00000015442	FSD1L	-1.62002	5.25099e-11	5.61808e-08
ENSGALG00000015446	POU2F1	-1.37047	0.00782783	0.0510958
ENSGALG00000015461		-2.52738	0.004127	NA
ENSGALG00000015464	PTGFRN	-2.50274	2.69205e-08	5.98344e-06
ENSGALG00000015572	CCDC125	-2.51853	0.0336957	NA
ENSGALG00000015605	BACH2	-1.12658	0.000387123	0.00576716
ENSGALG00000015615	DOK7	-1.19677	9.55396e-05	0.00212553
ENSGALG00000015630	EDIL3	-2.29802	0.00336211	NA
ENSGALG00000015681	NRIP1	-1.37022	1.72932e-06	0.000138451
ENSGALG00000015693	USP25	-1.15038	0.000166106	0.00316841
ENSGALG00000015721	SVEP1	-1.58206	2.11779e-08	5.19256e-06
ENSGALG00000015822		-1.54026	7.70609e-06	0.000362697
ENSGALG00000015828	BACH1	-1.04107	8.95906e-05	0.00201991
ENSGALG00000015835	GRIK1	-1.04063	0.0180076	0.0918271
ENSGALG00000015892	IRAK1BP1	1.30719	0.00476167	0.0356943
ENSGALG00000016014	RCAN1	1.05897	0.000323321	0.00504243
ENSGALG00000016017	SLC4A11	-1.29512	0.000205356	0.00368963
ENSGALG00000016094	SFXN5	-1.13333	0.0115121	0.0673056
ENSGALG00000016147	ZBTB21	-1.03164	0.010735	0.0641708
ENSGALG00000016173	UBASH3A	-1.10922	0.0146739	0.079731
ENSGALG00000016285		-1.66186	0.0462579	NA
ENSGALG00000016300	TINAG	1.34204	3.81452e-05	0.00109495
ENSGALG00000016309	KLHL31	-1.17284	1.4218e-07	2.04064e-05
ENSGALG00000016318	PCYT1B	-1.35186	0.0014068	0.0146489
ENSGALG00000016377	PXDN	-1.39173	0.000104305	0.00225242
ENSGALG00000016406	RPS6KA3	-1.32914	2.67749e-06	0.000177481
ENSGALG00000016412	MBOAT2	-1.38085	0.0350468	0.144118
ENSGALG00000016419	ASAP2	-1.46189	0.031113	0.132526
ENSGALG00000016440	KLF11	-1.79068	0.0146614	0.079725
ENSGALG00000016449	SLC66A3	-1.306	0.0480853	NA
ENSGALG00000016451	ROCK2	-1.08225	0.000660676	0.00842416
ENSGALG00000016456	LPIN1	-1.51933	4.90699e-07	5.36812e-05
ENSGALG00000016498	MFSD2B	-1.81616	0.0154156	NA
ENSGALG00000016507	FNDC4	1.74488	2.60765e-06	0.000175368
ENSGALG00000016518	PHKA2	-1.30739	0.00549764	0.0395542
ENSGALG00000016570		2.92773	0.0342379	NA
ENSGALG00000016590	TLR7	-2.31343	0.0283538	NA
ENSGALG00000016602	ARHGAP6	-1.06197	0.0120465	0.0696684
ENSGALG00000016610	PTRHD1	1.09713	0.00178021	0.0173151
ENSGALG00000016620	PNOC	-1.80909	0.0450503	NA
ENSGALG00000016635		-1.18874	4.1865e-05	0.0011648
ENSGALG00000016651		-2.06618	1.33943e-08	3.84482e-06
ENSGALG00000016707	CLIC5	-1.51243	3.72399e-07	4.42704e-05
ENSGALG00000016709	RCAN2	-1.3921	0.00135002	0.0142369
ENSGALG00000016768	LONRF2	-1.03389	0.00247949	0.0218944
ENSGALG00000016797	FHL2	-2.30568	0.0159994	0.0847037
ENSGALG00000016803	ST6GAL2	-1.78728	0.0285346	NA
ENSGALG00000016817	RASA3	1.0419	0.00376088	0.0297858
ENSGALG00000016870	TMTC4	-1.325	0.00105855	0.0119801
ENSGALG00000016889	RAP2A	-1.43003	0.0266275	0.11839
ENSGALG00000016927	KLF5	-2.00452	1.91051e-06	0.000144201
ENSGALG00000016954	RGCC	-1.32938	2.84999e-08	6.09845e-06
ENSGALG00000016959	DGKH	-2.27353	0.0438427	NA
ENSGALG00000016979	SLC25A30	1.27921	0.0154155	0.0822665
ENSGALG00000017000	RCBTB2	-1.03441	0.00503501	0.0370357
ENSGALG00000017062	NBEA	-1.30429	2.35347e-05	0.000782429
ENSGALG00000017085	SLC7A1	-1.14649	0.0364325	0.147955
ENSGALG00000017208	AMOTL1	-1.3314	3.52411e-07	4.26412e-05
ENSGALG00000017389	SIX4	-1.07665	1.66467e-06	0.000136052
ENSGALG00000017804	Y_RNA	1.40503	0.00353964	0.0285619
ENSGALG00000017857		1.4255	0.0430026	NA
ENSGALG00000018557	SOD3	-1.39361	0.00145675	0.0149342
ENSGALG00000018819		-1.93917	0.00511126	NA
ENSGALG00000020316	IL13RA2	-1.42217	0.00246992	0.0218724
ENSGALG00000020561		-1.15461	0.00157853	0.0158784
ENSGALG00000020647	LDLRAD1	-1.88506	3.27207e-06	0.000205744
ENSGALG00000020703	GRB14	-2.46177	0.000878885	0.0104692
ENSGALG00000020726	PDZD7	1.21879	0.000510636	0.00703709
ENSGALG00000020805	LRRC8D	-1.34746	0.036039	0.146966
ENSGALG00000021225	CDCA9	-1.36686	0.0293571	NA
ENSGALG00000021230	EPB42	-1.30528	0.0493326	0.180646
ENSGALG00000021285	UNG	-1.80863	5.51338e-06	0.000300403
ENSGALG00000021357		2.31056	0.0154461	0.0822929
ENSGALG00000021378	UBAP1	-1.01235	0.00116414	0.0127925
ENSGALG00000021567	EPHA8	1.34703	0.02225	0.105207
ENSGALG00000022531		-1.52457	0.0112021	0.0659515
ENSGALG00000022866	ZNF654	-1.18404	0.000283276	0.00460303
ENSGALG00000023172		3.19548	0.0190662	NA
ENSGALG00000023348	HPDL	1.94242	0.00779507	NA
ENSGALG00000023435	GATM	3.29545	0.0111726	0.0659012
ENSGALG00000023517	AGPAT2	-1.3831	0.00175256	0.0171169
ENSGALG00000023933	G0S2	2.72121	0.000846644	0.0101675
ENSGALG00000023953		-1.00995	0.0244901	0.112193
ENSGALG00000024041	FAHD1	1.19249	1.18439e-05	0.00048232
ENSGALG00000025751	NMRK2	1.54009	2.66354e-06	0.000177481
ENSGALG00000025773	SMIM29	1.29873	2.73595e-09	1.17989e-06
ENSGALG00000025774	HOXB2	1.02673	0.00887423	0.0558806
ENSGALG00000025884	NABP1	1.09603	0.00221144	0.0201599
ENSGALG00000025937	FXYD6	1.07136	2.3808e-06	0.000163857
ENSGALG00000026107		1.3223	0.00769297	0.0504178
ENSGALG00000026192	ST8SIA4	-1.31657	0.0204556	0.0993572
ENSGALG00000026359	SERTAD4	-1.03827	0.0166576	0.0874411
ENSGALG00000026360	SOWAHC	-1.53565	0.0124211	0.0707833
ENSGALG00000026460		-1.96705	5.16589e-06	0.000283324
ENSGALG00000026594	HS3ST5	1.04005	0.00116663	0.012796
ENSGALG00000026736	OGN	-1.65709	3.07113e-07	3.80465e-05
ENSGALG00000026816		1.283	0.00372987	0.0296
ENSGALG00000026896		-1.64454	2.95659e-05	0.000918411
ENSGALG00000026899	CHSY3	-2.20064	0.033161	NA
ENSGALG00000027192	NTS	-3.08927	0.04849	NA
ENSGALG00000027232	C1QTNF2	-1.43942	0.00131367	0.0139159
ENSGALG00000027742		1.37313	1.52612e-08	4.27642e-06
ENSGALG00000027786	SOCS3	-1.01278	0.0305042	0.130689
ENSGALG00000027874	CHAC1	1.72707	0.011731	0.0682341
ENSGALG00000028015	HES1	1.45956	0.0102725	0.0622061
ENSGALG00000028031	C1QL1	3.15575	0.021609	NA
ENSGALG00000028063	LOX	-1.7373	0.000106054	0.00226114
ENSGALG00000028081	ONECUT3	1.34943	0.0342901	NA
ENSGALG00000028140	CNTFR	1.14947	0.000113147	0.00234855
ENSGALG00000028290	C1H21ORF91	-1.05041	4.63299e-05	0.00124007
ENSGALG00000028304	MMR1L4	-1.45729	0.00363521	0.0291238
ENSGALG00000028346		-2.06397	0.00916987	0.0572354
ENSGALG00000028560	OC3	-1.98513	0.000727493	0.00907939
ENSGALG00000028570	C6orf132	4.37912	0.00206849	NA
ENSGALG00000028602	HMP19	2.04439	0.00623181	NA
ENSGALG00000028608	BTC	1.32356	5.64745e-06	0.000304247
ENSGALG00000028612		-1.15934	7.25865e-05	0.00170173
ENSGALG00000028626	DCLRE1B	1.496	0.0241846	0.1114
ENSGALG00000028790	DNASE2B	-1.12649	0.00969565	0.0594313
ENSGALG00000028830		3.24887	0.00246906	NA
ENSGALG00000028988	ART7C	-4.03416	0.0218924	NA
ENSGALG00000029000	HYAL3	1.82266	4.50838e-06	0.000261074
ENSGALG00000029132	gga-mir-6626	-1.01778	0.00510448	0.0373366
ENSGALG00000029322	FBXO39	1.06019	0.00493039	0.0365172
ENSGALG00000029660		-3.67019	0.0427495	NA
ENSGALG00000029709	INPP4A	-1.1866	2.51762e-07	3.25603e-05
ENSGALG00000029724	MTURN	-1.58991	0.0210579	NA
ENSGALG00000029731	TPP1	1.21272	8.40847e-10	4.71235e-07
ENSGALG00000029853		3.84254	0.0337461	NA
ENSGALG00000029912	CAMK1	1.50858	2.00885e-09	1.00729e-06
ENSGALG00000030324	ELAPOR2	-2.13134	0.0236393	NA
ENSGALG00000030419	GLS2	-1.09835	0.000271598	0.0044768
ENSGALG00000030512		3.54869	7.3502e-06	0.000355985
ENSGALG00000030540	gga-mir-1653	-1.27134	0.0470795	0.174954
ENSGALG00000030609		1.18191	0.000124894	0.00254376
ENSGALG00000030613	PDGFRB	-1.11702	1.82233e-06	0.000143939
ENSGALG00000030703	CYBRD1	-1.12567	0.0158694	0.0842052
ENSGALG00000030719	CLMN	-1.69989	0.0321674	NA
ENSGALG00000030720		2.16122	0.0387699	NA
ENSGALG00000030803		1.01446	0.0474088	0.1759
ENSGALG00000030809		-1.33122	0.0345153	0.14273
ENSGALG00000030890	RRS1	1.15308	2.45776e-05	0.0008037
ENSGALG00000030985	MYH7B	2.69119	0.000376875	0.00565745
ENSGALG00000030996		-2.24921	0.000906304	0.0106984
ENSGALG00000031013	DHDH	1.1183	0.000627683	0.00814465
ENSGALG00000031035	PCMTD1	-1.00565	9.97513e-05	0.00219845
ENSGALG00000031094	EDA2R	-1.45598	0.000222276	0.00389861
ENSGALG00000031112	COL5A2	-1.06917	3.20456e-05	0.000973581
ENSGALG00000031149		-1.26136	0.00154712	0.0156476
ENSGALG00000031298	SNRNP200	-1.00842	4.26336e-05	0.00117783
ENSGALG00000031312	ANAPC13	1.13571	0.0105218	0.0632436
ENSGALG00000031430		-1.63104	0.0439985	0.167308
ENSGALG00000031447		1.18413	0.030956	0.132192
ENSGALG00000031597	HBAD	-1.74058	0.000629377	0.00815763
ENSGALG00000031734	AQP11	1.80583	8.88114e-06	0.000393789
ENSGALG00000031735	CD5	-1.02727	0.01714	0.0890478
ENSGALG00000031853	PIGBOS1	1.06679	0.00036131	0.00547971
ENSGALG00000031862	BCL11B	-2.67648	0.0150194	NA
ENSGALG00000031917	ANKIB1	-1.0195	0.00132396	0.0139871
ENSGALG00000032181	LRP4	-1.15101	0.000274993	0.00451113
ENSGALG00000032403	MHM2	-2.32137	0.0388198	0.154296
ENSGALG00000032875	ATP5F1D	1.02285	5.11199e-07	5.46936e-05
ENSGALG00000032903		1.06225	0.0412524	0.160496
ENSGALG00000032958	AMPH	-4.37402	0.000785011	NA
ENSGALG00000032997	EMILIN2	-1.07704	0.00113247	0.0125499
ENSGALG00000033012	SPRY4	-3.50948	0.0203292	NA
ENSGALG00000033102	LRRFIP2	-1.62718	7.61704e-07	7.44164e-05
ENSGALG00000033170	GMDS	1.33646	0.0179945	0.0918271
ENSGALG00000033171	TGM4	-2.42472	0.0311291	NA
ENSGALG00000033638	SLC26A7	2.25264	0.0330512	NA
ENSGALG00000033894	MEA1	1.20006	1.39633e-06	0.000122139
ENSGALG00000033925		-3.46485	0.0181914	NA
ENSGALG00000034229	ZNF703	1.15471	0.00196923	0.0186451
ENSGALG00000034325	RBFOX1	-1.19939	4.44803e-07	5.13224e-05
ENSGALG00000034345		1.15603	1.05087e-06	9.51363e-05
ENSGALG00000034534	FAAP24	-1.17311	0.0107469	0.0641708
ENSGALG00000034661	ID1	1.00382	0.0145833	0.0796408
ENSGALG00000034737		1.01224	9.74845e-05	0.00216063
ENSGALG00000034970		-1.26606	7.20613e-05	0.00169279
ENSGALG00000035060	FKBP11	1.57654	3.91997e-05	0.00111435
ENSGALG00000035375	LRTOMT	1.52896	0.00439225	0.0334828
ENSGALG00000035378	DNAJC5	-1.22274	0.00097653	0.011309
ENSGALG00000035425		3.57439	0.0382795	NA
ENSGALG00000035584	COL3A1	-1.9829	1.42152e-05	0.000538403
ENSGALG00000035605		-1.49423	1.03423e-05	0.000436446
ENSGALG00000035701	SMAD3	-1.18291	0.00514353	0.0375756
ENSGALG00000035718	DOK1	-1.19317	0.0420535	0.162752
ENSGALG00000035932	ZC2HC1A	-1.28514	0.00183258	0.0177219
ENSGALG00000035940	SLC2A13	-1.02717	0.0384232	0.152982
ENSGALG00000035972	KRT75	2.73244	0.0459349	NA
ENSGALG00000036017	NCOA2	-1.19917	2.01832e-10	1.60335e-07
ENSGALG00000036095	BICC1	-1.05989	0.00802846	0.0522027
ENSGALG00000036106	SMPD1	1.07677	3.17476e-08	6.55504e-06
ENSGALG00000036412	TMEM108	-1.65948	0.00102787	0.011776
ENSGALG00000036471	RFTN2	-1.56726	1.09748e-07	1.65592e-05
ENSGALG00000036497	SOX4	1.01436	0.00958949	0.0589957
ENSGALG00000036568	gga-mir-7444	-1.61688	0.0410049	NA
ENSGALG00000036589	GFRA4	-3.22074	0.0074874	NA
ENSGALG00000036645	KIF15	-1.52936	0.0389668	NA
ENSGALG00000036659	NDUFAF8	1.53937	2.95188e-08	6.20369e-06
ENSGALG00000036738	IGSF3	-1.27875	0.000107445	0.00228252
ENSGALG00000036763		-1.03115	0.022239	0.105201
ENSGALG00000036775	SETBP1	1.13272	0.00410862	0.031875
ENSGALG00000036883	MET	-1.41094	0.00120795	0.0130786
ENSGALG00000036901	TSPAN18	-1.06504	0.0027323	0.0234547
ENSGALG00000036920	SLC22A5	-1.25414	8.44369e-06	0.000383683
ENSGALG00000037050	FABP3	1.3059	7.42876e-11	7.28576e-08
ENSGALG00000037253		3.54662	0.0242304	NA
ENSGALG00000037336	PRTG	1.71902	0.00390722	0.0306561
ENSGALG00000037545	GRIP2	1.39677	0.00642304	0.0441805
ENSGALG00000037556	SLC1A2	-2.46264	9.12866e-06	0.000395661
ENSGALG00000037675	COL14A1	-2.00148	0.038968	NA
ENSGALG00000037682	CCSER2	-1.16642	2.43242e-06	0.000165475
ENSGALG00000037946		1.3589	0.000171581	0.00324131
ENSGALG00000037980		1.29896	0.0226939	0.106366
ENSGALG00000038265	CREB5	-1.55377	0.00172408	0.0169173
ENSGALG00000038311	COL18A1	-1.04883	0.000287956	0.00464876
ENSGALG00000038364	CCN3	-4.58642	0.000239302	NA
ENSGALG00000038512	AGTR1	-1.34666	0.000769058	0.00944785
ENSGALG00000038589	ABHD14B	1.42447	0.000205659	0.00368963
ENSGALG00000038924	IDE	-1.25898	2.02161e-06	0.000146867
ENSGALG00000039099	MAPK9	-1.30123	0.000189019	0.00347047
ENSGALG00000039190	CDK2AP2	1.22479	1.69245e-07	2.34335e-05
ENSGALG00000039205		2.06249	0.0128161	0.0723072
ENSGALG00000039216	COL6A2	-1.20985	1.4529e-06	0.000123907
ENSGALG00000039221		-1.05908	0.00790821	0.051467
ENSGALG00000039656		-1.52278	0.0299472	NA
ENSGALG00000039864		1.34128	0.000428376	0.00620117
ENSGALG00000039919		2.95194	0.0170889	NA
ENSGALG00000039978	SLC4A1	-1.07465	2.76641e-05	0.000875213
ENSGALG00000039989	GPR160	1.15923	5.14409e-05	0.0013394
ENSGALG00000040128	SNAP29	-1.02937	0.000747779	0.00924434
ENSGALG00000040276	RUNX2	2.31234	0.0282492	NA
ENSGALG00000040418	DGAT2	2.08692	0.00460476	0.0347172
ENSGALG00000040532	ZIC1	2.53732	0.000890975	NA
ENSGALG00000040553	SLC27A1	-1.20518	0.000808766	0.00979566
ENSGALG00000040621	IL18R1	-1.00937	0.0341458	0.142113
ENSGALG00000040644	C8G	1.25479	0.0138467	0.0768748
ENSGALG00000040833		1.15757	0.00111255	0.0124346
ENSGALG00000041054		-2.24509	0.0226099	NA
ENSGALG00000041183	SGPP1	-2.5477	0.000302877	0.00481047
ENSGALG00000041266	CNN1	-1.6912	2.22006e-07	2.96907e-05
ENSGALG00000041362	SECISBP2L	-1.05062	5.97241e-05	0.00148682
ENSGALG00000041437	FAM155B	-1.21607	0.0169114	0.0882971
ENSGALG00000041459	DDIT4	1.11534	0.031765	0.134623
ENSGALG00000041547	DCP1A	-1.33214	0.000402341	0.00591895
ENSGALG00000041555	COL1A1	-1.14562	0.00170364	0.0167784
ENSGALG00000041563	UNC80	-2.77299	0.0049993	NA
ENSGALG00000041564	MAN1A2	-1.00864	0.00177719	0.0173
ENSGALG00000041693		1.4586	0.0418435	0.162187
ENSGALG00000041708	WNT4	1.95904	0.0179406	NA
ENSGALG00000041752	CD164L2	1.19416	6.47121e-06	0.00033303
ENSGALG00000041822	FGF22	2.06143	0.00904653	NA
ENSGALG00000041833		1.2397	0.000273754	0.00450603
ENSGALG00000041854	FAM184B	1.03593	0.0207514	0.100338
ENSGALG00000042030	P4HA3	-1.10834	0.0197254	0.096923
ENSGALG00000042079	NID1	-1.81744	1.65296e-16	1.11512e-12
ENSGALG00000042265		-1.03432	0.0381215	0.152189
ENSGALG00000042356	FSTL3	-1.17327	0.000596642	0.00786324
ENSGALG00000042388		-1.06932	0.0027942	0.0238989
ENSGALG00000042534	NFATC1	1.26737	5.54467e-05	0.00141519
ENSGALG00000042619		3.12135	0.0203508	NA
ENSGALG00000042679	RETREG1	-1.38372	0.0197102	0.0969194
ENSGALG00000042708		1.10713	0.00260214	0.0225845
ENSGALG00000042744	RGS2	1.06475	0.00110376	0.0123598
ENSGALG00000042929		1.41708	0.000676693	0.00857265
ENSGALG00000043018	DLG5	-1.65102	2.00283e-06	0.000146867
ENSGALG00000043164	TNKS	-1.14244	8.00191e-07	7.60271e-05
ENSGALG00000043234	HBA1	-1.38294	1.55481e-05	0.000573622
ENSGALG00000043283	LGI2	1.01191	0.00748426	0.0495958
ENSGALG00000043302	LAT2	1.10764	0.00340628	0.027762
ENSGALG00000043555	NPNT	-1.43221	0.00837791	0.0538796
ENSGALG00000043597	RAD54B	-1.25238	0.0441479	NA
ENSGALG00000043623	ARL14	-1.14689	0.00852552	0.0543831
ENSGALG00000043671		1.12937	0.00471087	0.0353586
ENSGALG00000044272		3.48343	0.0355527	NA
ENSGALG00000044610	CFAP100	2.11916	0.00141577	0.0147063
ENSGALG00000044654	C22orf39	1.04751	1.91783e-06	0.000144201
ENSGALG00000044935		-1.84906	0.00252658	0.0221936
ENSGALG00000044975	KY	-1.29638	0.0105341	0.0632851
ENSGALG00000044996	TMEM71	-3.66753	0.00475155	NA
ENSGALG00000045036		1.198	0.0243143	0.111776
ENSGALG00000045469	BCAN	-3.48798	0.0372636	NA
ENSGALG00000045607	CXCL13	-3.00638	0.0463404	NA
ENSGALG00000045816		-1.99766	0.0279646	NA
ENSGALG00000046371		1.13569	4.81372e-09	1.61865e-06
ENSGALG00000046425		1.35467	0.0205961	0.0998138
ENSGALG00000046687	EPS8L3	1.11355	0.0380087	0.151962
ENSGALG00000046749		1.53514	0.00676895	0.0461017
ENSGALG00000046846		1.86042	0.01858	NA
ENSGALG00000046852		-1.28609	0.0134681	0.0753358
ENSGALG00000046992	MCRIP2	1.41311	3.53577e-15	1.38708e-11
ENSGALG00000047014		2.41682	0.00235424	0.0211666
ENSGALG00000047152	HBBA	-1.38075	8.93379e-06	0.000393789
ENSGALG00000047166		3.32065	0.0140195	NA
ENSGALG00000047186		-1.31843	0.000527707	0.00722162
ENSGALG00000047202		1.9243	0.0308241	0.131916
ENSGALG00000047235		-1.03297	0.0181916	0.0922035
ENSGALG00000047312		-1.6698	0.000829179	0.00998834
ENSGALG00000047320	MFAP5	-1.13987	3.84831e-05	0.00110196
ENSGALG00000047425		1.21463	0.0151253	0.0811348
ENSGALG00000047451		3.27386	0.00741864	NA
ENSGALG00000047499		4.11211	0.0448034	NA
ENSGALG00000047606		-1.0926	0.000415276	0.00607883
ENSGALG00000047811		2.49582	0.0185564	NA
ENSGALG00000047914		1.41902	0.0226785	0.106366
ENSGALG00000048001		1.1642	0.000177321	0.00332065
ENSGALG00000048059		-1.21292	0.0140609	0.0776188
ENSGALG00000048243		1.61832	0.0422374	NA
ENSGALG00000048261	HES6	1.50433	4.15191e-05	0.00115791
ENSGALG00000048327		-1.15032	0.00939627	0.0581107
ENSGALG00000048345		-1.30018	0.00936991	0.0579782
ENSGALG00000048448		1.09564	4.39371e-05	0.00120255
ENSGALG00000048493		-5.15485	0.00766515	0.0503411
ENSGALG00000048546		-1.23985	7.91212e-07	7.60271e-05
ENSGALG00000048560		2.61907	0.0194662	NA
ENSGALG00000048579		-2.21182	0.00145518	0.0149342
ENSGALG00000048610		3.07966	0.0224384	NA
ENSGALG00000048624	SGPP2	-3.10272	0.0474208	NA
ENSGALG00000048849		-2.29856	0.00911929	NA
ENSGALG00000049001	ANKRD39	1.28321	0.000177756	0.00332065
ENSGALG00000049040		1.3647	0.0378792	NA
ENSGALG00000049232		-1.102	0.015862	0.0842039
ENSGALG00000049241		2.51753	0.000269459	0.00446951
ENSGALG00000049357		1.80969	0.0144357	NA
ENSGALG00000049379		-1.82472	0.00518203	0.0377864
ENSGALG00000049422	ATF3	-2.13516	0.00383021	0.0301725
ENSGALG00000049529		-1.03621	1.7753e-05	0.000619987
ENSGALG00000049629		1.20863	0.000973554	0.0112996
ENSGALG00000049668	MFSD4B	-1.00133	0.00105858	0.0119801
ENSGALG00000049689		1.43461	0.040171	NA
ENSGALG00000049729		-4.07214	0.0135369	NA
ENSGALG00000049781		-1.50529	0.000333686	0.00513883
ENSGALG00000049832		1.03201	0.00679624	0.0462608
ENSGALG00000049995		-2.73049	0.0304926	NA
ENSGALG00000050005		1.13826	0.000201395	0.00364407
ENSGALG00000050065	CYSLTR2	-1.70763	0.00848647	0.0541941
ENSGALG00000050116		2.80001	0.0348068	NA
ENSGALG00000050125		1.36284	0.0115436	0.0674229
ENSGALG00000050138		2.73827	0.0227626	NA
ENSGALG00000050189		-1.37743	0.0113526	0.0665381
ENSGALG00000050395		-4.1927	0.00668002	NA
ENSGALG00000050460		-1.28542	1.4174e-06	0.000122657
ENSGALG00000050472		1.20742	0.0197149	0.0969194
ENSGALG00000050491	SLC35E4	1.12774	0.0138971	0.0769672
ENSGALG00000050503	TNFRSF4	1.05304	0.0118341	0.0686088
ENSGALG00000050516		-3.30651	0.0251894	NA
ENSGALG00000050575		1.74851	0.00139472	0.0146039
ENSGALG00000050752		1.54878	0.0160668	0.0850007
ENSGALG00000050796		1.00337	0.000168898	0.00321645
ENSGALG00000050893	CCR2	-1.12662	0.00336485	0.0275198
ENSGALG00000051022		-1.16241	0.000732163	0.00909908
ENSGALG00000051072		1.38394	0.0346042	0.142897
ENSGALG00000051074		-3.75528	0.00726106	NA
ENSGALG00000051088		-2.82268	0.0235505	NA
ENSGALG00000051099		-2.30001	0.00386497	0.030376
ENSGALG00000051104		-2.00028	0.00620729	NA
ENSGALG00000051152		-1.12551	5.17585e-06	0.000283324
ENSGALG00000051259		-1.03028	2.95758e-05	0.000918411
ENSGALG00000051290		1.52938	0.033223	0.138949
ENSGALG00000051347		-1.14232	0.000731984	0.00909908
ENSGALG00000051378		-1.58998	0.0132437	NA
ENSGALG00000051383		-1.35074	0.0379896	0.151962
ENSGALG00000051385		-1.10144	5.34271e-05	0.00138194
ENSGALG00000051512		-3.31845	0.025046	NA
ENSGALG00000051711		2.55893	0.0493795	NA
ENSGALG00000051869		-1.31819	0.00422215	0.0324987
ENSGALG00000051918	TTC24	1.09471	0.000110328	0.00232282
ENSGALG00000051919	BAALC	-2.64539	0.00795008	NA
ENSGALG00000051947	OPA3	1.20113	4.57606e-07	5.17843e-05
ENSGALG00000052045		3.2596	0.00326693	NA
ENSGALG00000052054		4.54665	0.00277521	NA
ENSGALG00000052058		1.03669	0.0297477	0.128477
ENSGALG00000052087		1.19469	0.0044437	0.0337851
ENSGALG00000052333		-1.19136	0.00189956	0.0182071
ENSGALG00000052389		-3.01937	1.48707e-05	0.000557368
ENSGALG00000052544		2.51545	0.00346478	NA
ENSGALG00000052593		-2.2518	0.0362755	NA
ENSGALG00000052696		3.31758	3.50769e-05	0.00103205
ENSGALG00000052702		1.55991	0.00216496	0.0199369
ENSGALG00000052736		1.34667	0.0436626	0.166621
ENSGALG00000052741		1.14355	1.9819e-08	4.96276e-06
ENSGALG00000052767		-1.35073	1.4319e-05	0.000538403
ENSGALG00000052782		1.18305	0.00550382	0.0395542
ENSGALG00000052816		1.2992	9.3471e-06	0.000401482
ENSGALG00000052853		-1.5386	0.000131307	0.0026507
ENSGALG00000052863		-2.34786	0.0320525	NA
ENSGALG00000052866		2.49725	0.0136059	NA
ENSGALG00000053036		-2.18344	0.00481855	0.0358694
ENSGALG00000053106	FAM181B	1.28937	0.00019333	0.00353856
ENSGALG00000053114		3.39541	0.0165891	NA
ENSGALG00000053220		1.72964	0.00772837	0.0505565
ENSGALG00000053241		-1.67475	0.0140091	0.0774052
ENSGALG00000053436		-1.74674	0.0295014	NA
ENSGALG00000053627		-1.14152	0.00249721	0.0220147
ENSGALG00000053653	ZNF467	1.21473	3.21172e-07	3.93737e-05
ENSGALG00000053700		1.19121	4.3497e-05	0.00119328
ENSGALG00000053749		-3.48113	0.0159312	NA
ENSGALG00000053878		-1.67967	0.0193617	NA
ENSGALG00000053959		1.40393	0.00896996	0.0562726
ENSGALG00000053999	VPS37D	1.58495	1.94461e-08	4.96276e-06
ENSGALG00000054047		3.58388	0.0309574	NA
ENSGALG00000054123		-3.75724	0.0151438	NA
ENSGALG00000054273	RASSF8	-1.73987	1.01396e-06	9.25064e-05
ENSGALG00000054304		-1.18221	0.0100139	0.0609064
ENSGALG00000054305		1.32741	0.0421951	0.162969
ENSGALG00000054306	SRXN1	1.10643	6.77164e-08	1.22608e-05
ENSGALG00000054329		-1.40825	0.000322658	0.00504243
ENSGALG00000054377		-1.78767	0.0221674	0.104994
ENSGALG00000054381	SNORD14	1.98624	0.000667557	0.00848432
ENSGALG00000054409		1.5628	0.00292988	0.0248427
ENSGALG00000054412		-1.36767	0.00289096	0.0245659
ENSGALG00000054460		1.84865	0.00370817	0.0294675
ENSGALG00000054562		1.32917	9.03591e-05	0.00202559
ENSGALG00000054680		2.54728	0.0284363	NA
ENSGALG00000054746		1.58797	1.04675e-05	0.000439973
ENSGALG00000054944	GULP1	-1.17229	6.39972e-06	0.000331799
ENSGALG00000055053	PRSS35	-1.00187	1.78291e-05	0.000620799
ENSGALG00000055058		-2.20035	0.000159628	0.00309934
ENSGALG00000055067		2.0609	0.0493735	NA
ENSGALG00000055086		1.58992	3.50443e-05	0.00103205
