# Supplementary material for: Transcriptomic and Metabolomic Profile Analysis of Muscles Reveals Pathways and Biomarkers Involved in Flavor Differences between Caged and Cage-Free Chickens
Source: MDPI journal article supplement (doi:10.3390/foods11182890), 2022-09-17
Supplement: s1 [file s1 › Supplementary file S4ú║Differential Metabolites.xlsx]

## Sheet: opls-da
Metabolite	Vip_plsda	Vip_oplsda	P_value	fdr	FC
metab_932	0.938453	1.02959	0.04034	0.2304	0.986473
metab_2880	0.91866	1.0351	0.004518	0.06568	1.02091
metab_3144	0.951836	1.03562	0.0002383	0.01229	1.01308
metab_3853	0.962805	1.04711	0.009761	0.1119	1.02209
Methylpyrazine	1.11807	1.0539	0.01395	0.1308	0.981334
metab_11	1.0463	1.05645	0.04967	0.2558	0.980809
metab_518	1.03043	1.08301	0.004638	0.06681	1.02488
metab_1004	0.995924	1.08795	0.0005942	0.01918	1.01702
metab_3075	1.02259	1.09026	0.03192	0.2075	0.975546
metab_1662	1.01688	1.09429	0.006542	0.08539	1.02235
metab_1101	1.11304	1.09434	0.003287	0.0523	1.02864
metab_1390	1.01456	1.09528	0.001086	0.0265	1.01821
metab_3286	1.02578	1.09609	0.03896	0.2252	1.03175
metab_3471	0.984777	1.09639	0.02799	0.1925	1.02314
metab_2831	1.21342	1.10166	0.0008089	0.0223	0.982071
metab_3332	1.08949	1.10507	0.02917	0.1968	0.970921
Culpin	1.0943	1.10751	0.04329	0.2383	0.978442
metab_3738	1.36639	1.10831	0.04448	0.2399	1.03001
metab_3394	1.05504	1.10875	0.02811	0.1928	0.96509
metab_3866	1.06792	1.12674	0.0009023	0.02351	1.02661
metab_3320	1.19353	1.12804	0.0003173	0.0139	1.02556
metab_811	1.07557	1.129	0.04375	0.2388	0.982816
metab_835	1.15567	1.13647	0.03693	0.2198	1.03206
Cycloposine	1.04276	1.13908	0.04053	0.2309	0.978285
metab_3329	1.04161	1.14199	0.02286	0.1716	0.977281
metab_3552	1.39879	1.15236	0.04071	0.2313	1.03171
metab_3896	1.05504	1.15352	0.04251	0.236	1.04982
metab_2445	1.16322	1.17149	0.0109	0.1184	1.027
metab_3743	1.11227	1.17424	0.0454	0.2424	1.03318
metab_370	1.06889	1.18059	0.03852	0.2252	1.02313
metab_381	1.20868	1.18878	0.01651	0.1431	0.968315
metab_3380	1.1252	1.18987	0.000446	0.01698	0.97857
metab_565	1.20178	1.19449	0.03614	0.2181	1.04609
metab_2695	1.04017	1.19489	0.002841	0.04786	1.02323
metab_3910	1.08464	1.19775	0.00182	0.03486	1.02741
metab_3289	1.07457	1.19878	0.0001409	0.01019	0.977311
metab_315	1.2372	1.20735	0.03657	0.2187	0.972584
metab_1481	1.05423	1.20931	0.001334	0.03047	0.980684
metab_1364	1.09898	1.21389	0.00143	0.03129	1.02416
metab_2998	1.11777	1.21462	0.008834	0.1048	1.03992
metab_3712	1.29372	1.22594	0.02045	0.1615	1.03059
metab_790	1.21131	1.23973	0.007674	0.09586	0.977093
metab_2817	1.08068	1.2433	0.02421	0.1772	0.969305
3-(2-amino-2-oxoethyl)-5-methyl-hexanoic acid	1.08504	1.24428	0.007308	0.09201	0.982271
Oxidized glutathione	1.14032	1.26065	0.01765	0.1501	1.0269
metab_327	1.2279	1.269	0.01196	0.125	0.969832
metab_1	1.16579	1.26976	0.001543	0.03269	1.02058
metab_1362	1.14369	1.27073	0.03698	0.2198	0.957933
metab_2502	1.2148	1.27686	0.01629	0.1424	1.03837
metab_3766	1.19382	1.29688	0.01291	0.129	1.0308
metab_85	1.18781	1.297	0.0354	0.2169	1.03043
metab_2340	1.21864	1.2996	0.03562	0.2174	1.0582
metab_1660	1.26478	1.3013	0.001158	0.02737	1.03304
3-methyl-6-(2-methylpropyl)piperazine-2,5-dione	1.16236	1.30451	0.02422	0.1772	0.966051
metab_3934	1.22464	1.31546	0.0002244	0.01176	1.02091
metab_420	1.42896	1.32348	0.03761	0.2223	1.04126
metab_1081	1.25559	1.33206	0.000488	0.01731	1.03073
metab_690	1.50846	1.3439	0.01188	0.1246	1.03542
Spermidine	1.30794	1.35199	0.04793	0.2497	0.954889
metab_3657	1.27658	1.35319	0.02424	0.1772	1.03304
metab_3666	1.14869	1.36586	0.02608	0.1849	1.02676
metab_321	1.38795	1.37608	0.04573	0.2429	0.962727
metab_142	1.20079	1.37672	0.003693	0.05761	1.02649
metab_3248	1.22177	1.37936	0.03378	0.2117	0.963695
Scytophycin B	1.36117	1.38542	0.04323	0.2383	1.04006
metab_3503	1.27044	1.38607	0.0002988	0.01365	1.03318
metab_3697	1.14511	1.38915	0.04369	0.2388	1.03465
metab_718	1.37143	1.39031	0.009819	0.1119	0.963369
Succinylcarnitine	1.50103	1.39045	0.02635	0.1858	1.03128
metab_716	1.21435	1.39348	0.02319	0.1725	0.949267
metab_3605	1.26568	1.40577	0.03309	0.2084	1.04327
metab_157	1.26461	1.40927	0.01802	0.1512	1.02679
metab_3241	1.42312	1.41703	0.03638	0.2187	0.945344
metab_86	1.30493	1.4196	0.0054	0.07476	1.03234
metab_2594	1.37177	1.42331	0.01943	0.1569	0.966224
metab_656	1.31621	1.42853	0.01108	0.119	0.967301
metab_3759	1.31024	1.43407	0.009961	0.1126	1.03304
LysoPE(18:2(9Z,12Z)/0:0)	1.40779	1.44618	0.01701	0.1465	0.963037
metab_144	1.31598	1.45536	0.001423	0.03129	1.02474
MJAW00537	1.32697	1.45824	0.001754	0.03399	0.975913
metab_3799	1.38341	1.46099	0.02385	0.1761	0.945168
metab_417	1.36773	1.47185	0.01207	0.1253	1.0371
metab_3417	1.35022	1.47532	0.00472	0.06769	1.03806
PC(18:0/20:4(8Z,11Z,14Z,17Z))	1.3353	1.48615	0.04392	0.2393	1.03234
metab_613	1.33115	1.49247	0.02306	0.1725	1.03512
metab_1608	1.33651	1.49304	0.01374	0.1302	1.04586
metab_3281	1.40732	1.49306	5.392e-05	0.008211	1.03661
metab_602	1.45094	1.49525	0.02225	0.169	1.04257
metab_630	1.39623	1.49609	0.03976	0.2283	0.959887
metab_616	1.31967	1.49671	0.03204	0.2078	1.03764
metab_1942	1.39842	1.49725	0.000167	0.01027	1.04045
5,7-dihydroxy-3-(4-hydroxyphenyl)-6,8-bis(3-methylbut-2-enyl)chromen-4-one	1.55752	1.49886	0.03014	0.2012	0.946974
metab_3598	1.50311	1.50806	0.01761	0.1501	1.05243
metab_592	1.53786	1.51026	0.04533	0.2424	0.940516
metab_1096	1.4879	1.51418	0.03387	0.2117	0.935778
Glycerophosphocholine	1.3766	1.51767	0.01917	0.156	1.04076
metab_323	1.49517	1.51891	0.02125	0.1658	0.959846
metab_1948	1.42227	1.5222	0.000269	0.01324	1.04127
metab_951	1.35922	1.52662	0.0008037	0.0223	1.04268
(2S)-2-amino-3-(3-methylimidazol-4-yl)propanoic acid	1.46272	1.53273	0.003154	0.05118	1.03611
L-Proline	1.49313	1.53423	0.01376	0.1302	1.03368
Tizoxanide glucuronide	1.38932	1.53436	0.009404	0.1094	1.03326
1-Pyrroline	1.52292	1.53701	0.01806	0.1512	1.04454
metab_3646	1.26802	1.5428	0.04279	0.2372	1.03922
5'-CMP	1.48083	1.54677	0.00807	0.09964	0.960511
metab_3739	1.48074	1.54743	0.04119	0.2323	1.05468
Spermine	1.47419	1.54856	0.03121	0.2047	0.950071
metab_3537	1.50957	1.55315	0.005985	0.08007	1.04365
metab_3322	1.59658	1.55692	0.01869	0.1533	1.06372
metab_325	1.31322	1.55838	0.006571	0.08543	0.965561
metab_3780	1.46825	1.5857	0.02096	0.1643	1.05572
metab_414	1.44579	1.58599	0.002743	0.04786	1.03808
metab_1657	1.50492	1.58609	0.04019	0.2299	1.0861
metab_1298	1.43124	1.58853	0.0006571	0.01946	1.04926
metab_549	1.52478	1.59585	0.02195	0.1681	0.936529
metab_2005	1.66599	1.59596	0.01638	0.1427	1.07237
metab_686	1.45864	1.59953	0.0005956	0.01918	1.03744
metab_3583	1.39964	1.60957	0.01529	0.1362	1.05188
D-Ornithine	1.62443	1.61444	0.0126	0.1277	1.05155
metab_87	1.47369	1.62357	0.000152	0.01019	1.03011
metab_1536	1.50211	1.62402	0.0163	0.1424	0.953352
metab_2633	1.45771	1.63465	0.01274	0.1278	0.959218
metab_2663	1.58238	1.63506	0.008665	0.1042	0.952398
metab_3792	1.68072	1.63594	0.03123	0.2047	0.932427
O-Arachidonoyl Glycidol	1.60544	1.6478	0.00649	0.08506	0.954761
7E-Mycosinyl acetate	1.60644	1.65075	0.00278	0.04786	0.959153
metab_1692	1.58529	1.66495	0.02335	0.1732	1.05713
metab_2611	1.59517	1.66625	0.01312	0.1291	0.953115
metab_3254	1.77587	1.6742	0.006811	0.08747	1.06993
metab_527	1.63293	1.67514	3.332e-06	0.005328	1.04474
metab_3225	1.61512	1.67881	0.0136	0.13	0.944329
metab_729	1.50097	1.68471	0.0009043	0.02351	1.05098
metab_1027	1.61502	1.6849	0.01097	0.1184	0.944157
metab_992	1.95594	1.68937	0.00189	0.03555	1.04517
metab_412	1.52914	1.69303	0.01353	0.13	0.957046
metab_2204	1.65347	1.6946	0.0396	0.2278	1.06895
LysoPC(22:4(7Z,10Z,13Z,16Z))	1.62949	1.69922	0.0113	0.1201	0.955714
metab_3671	1.66186	1.71626	0.02439	0.1772	0.936191
metab_401	1.55901	1.72003	0.001593	0.03292	1.0401
metab_385	1.5399	1.72331	0.004003	0.06039	0.95938
metab_1563	1.66639	1.72369	0.0339	0.2117	0.93743
metab_1108	1.57404	1.72543	0.04562	0.2429	0.92516
metab_588	1.78491	1.72881	0.02494	0.1792	1.08362
metab_735	1.8347	1.73847	0.03155	0.2055	1.10322
metab_3758	1.55316	1.74761	0.000973	0.02489	1.0461
metab_406	1.58952	1.748	0.003795	0.05808	0.959239
metab_3548	1.61717	1.75643	0.04573	0.2429	0.941453
metab_1091	1.7304	1.76308	0.01524	0.1362	0.939044
metab_5	1.53699	1.77104	0.0127	0.1277	1.03986
Pantothenic Acid	1.69531	1.7753	0.007479	0.0938	0.954862
metab_642	1.56744	1.7756	0.01918	0.156	0.948431
metab_668	1.49015	1.77612	0.03593	0.2178	1.06097
metab_770	1.72668	1.77781	0.001381	0.03103	1.05823
metab_2994	1.86896	1.78225	0.0429	0.2373	0.902439
metab_1589	1.68083	1.78653	0.02703	0.1879	0.922614
metab_34	1.50666	1.79044	0.01416	0.132	1.04348
metab_3756	1.61751	1.79116	0.0001595	0.01019	1.04061
(3Z)-3-Butylidene-6,7-dihydroxy-4,5,6,7-tetrahydro-2-benzofuran-1(3H)-one	1.7125	1.79523	0.01176	0.1241	0.934759
6-(2-carboxy-3,5-dihydroxyphenoxy)-3,4,5-trihydroxyoxane-2-carboxylic acid	1.67917	1.79605	0.0006353	0.01935	0.956786
metab_1853	1.74363	1.79722	0.0417	0.2331	1.078
metab_33	1.72819	1.80671	0.007065	0.09002	0.945194
metab_2662	1.64908	1.81003	0.002325	0.04224	0.957683
metab_3276	1.59885	1.82102	0.001388	0.03103	0.954076
metab_9	1.7821	1.8262	0.009557	0.1099	0.946644
(3R,4R)-4,5-dihydroxy-3-methoxy-4-(4-methoxyphenyl)-1,3-dihydroquinolin-2-one	1.76894	1.83513	0.009851	0.1119	0.937465
Flumazenil acid	1.78112	1.84847	0.007229	0.09138	0.930334
metab_419	1.77473	1.84882	0.003543	0.05554	1.05218
2-Methylbutyroylcarnitine	1.95235	1.85776	0.01048	0.1171	1.0548
metab_188	1.77044	1.85791	0.0121	0.1253	0.929233
metab_316	1.70101	1.85866	0.02653	0.1865	0.933479
metab_3404	1.81865	1.85906	0.004185	0.06196	1.05811
metab_82	1.6808	1.85919	0.001365	0.03096	1.04579
metab_2312	1.7897	1.86321	0.01231	0.1266	0.927755
metab_786	1.83408	1.86331	0.003185	0.05118	1.0692
metab_728	1.76078	1.86851	0.0009012	0.02351	1.05571
metab_3728	1.70588	1.87766	0.01829	0.152	1.06411
Adenosine 3',5'-Diphosphate	1.70102	1.88038	0.002885	0.0483	0.950551
metab_387	1.68692	1.8843	0.0005343	0.01818	0.957234
metab_3745	1.70694	1.8875	0.004898	0.06962	0.952809
metab_930	1.85222	1.89158	0.0006428	0.01939	1.07057
metab_3928	1.85879	1.89742	0.0004768	0.01731	1.0669
metab_409	1.75856	1.89926	0.02637	0.1858	0.937158
metab_3977	1.59916	1.89962	0.03303	0.2084	1.10719
metab_3694	1.84638	1.90812	0.0008439	0.02287	0.947656
Mesterolone	1.85857	1.91281	0.005807	0.07869	0.934328
LysoPE(22:4(7Z,10Z,13Z,16Z)/0:0)	1.82471	1.91423	0.004305	0.06293	0.947829
metab_2822	1.95181	1.91837	0.01747	0.1498	0.906235
METHACHOLINE	1.96933	1.92004	0.001023	0.02535	1.05213
metab_3094	1.99767	1.92909	0.03507	0.2161	1.09906
metab_3724	1.69248	1.93451	0.02517	0.1798	1.06905
metab_755	1.97588	1.93513	0.02821	0.1928	1.11231
metab_603	1.74725	1.93823	0.01997	0.1601	0.934277
metab_212	1.9974	1.94808	0.04234	0.2358	0.91283
Ruscogenin	1.76771	1.95041	0.001432	0.03129	0.95161
metab_3335	1.99473	1.95552	0.03255	0.2078	0.899016
N-Monodesmethyl-rizatriptan	1.99825	1.96486	0.004309	0.06293	1.06592
metab_2631	2.02106	1.9663	0.04448	0.2399	0.886303
metab_3389	1.9831	1.98254	0.001094	0.0265	1.07628
metab_411	1.81501	2.00906	0.002795	0.04786	1.06375
PC(14:0/0:0)	1.84873	2.01234	0.004547	0.0658	0.93211
metab_1472	1.92178	2.01522	0.01487	0.1346	0.916252
metab_1394	2.0328	2.01847	0.02431	0.1772	0.884119
metab_3616	2.30918	2.02064	0.03402	0.2121	1.12839
metab_3775	1.78812	2.02212	0.01353	0.13	1.09248
metab_3763	1.80901	2.03095	0.0003443	0.01447	1.05745
Nicotinamide adenine dinucleotide (NAD)	2.06671	2.03249	0.03488	0.2161	0.930757
Allyl valerate	2.04855	2.03442	0.02471	0.178	0.91738
metab_1029	1.90835	2.03471	0.01826	0.152	0.886436
metab_3403	1.96866	2.03704	0.001567	0.03275	0.916937
metab_2821	2.02769	2.04221	0.0195	0.1571	0.896349
metab_1528	1.87704	2.04717	0.00823	0.1005	0.916297
metab_1488	1.90631	2.06269	0.0005032	0.01731	0.927225
metab_3753	1.86054	2.06642	0.002659	0.04725	1.0699
metab_787	1.91787	2.06839	0.004871	0.06955	1.11524
metab_3798	1.74182	2.06851	0.01388	0.1308	0.919604
metab_3755	1.85249	2.07573	0.001222	0.02836	1.06541
metab_3262	2.58086	2.10122	0.01249	0.1272	1.10391
metab_3729	1.89307	2.10775	0.01705	0.1465	1.08221
metab_747	2.13723	2.10811	0.008207	0.1005	1.07782
metab_2485	2.15341	2.1141	0.009054	0.1062	0.912047
metab_3705	1.98367	2.12435	0.0001615	0.01019	0.956228
DIMP	1.93431	2.1278	0.000397	0.01587	0.951262
metab_2687	2.05768	2.14644	0.02815	0.1928	0.892777
metab_410	1.92993	2.15323	0.0001625	0.01019	1.05782
metab_3689	1.86385	2.15386	0.02217	0.1688	1.11484
metab_3784	2.50807	2.17481	0.01494	0.1346	0.906052
N-Carbamoylsarcosine	2.1037	2.18908	0.002844	0.04786	1.09128
metab_32	1.88426	2.19196	0.001164	0.02737	0.945525
Glycidyl oleate	2.0888	2.20269	0.003348	0.053	0.9222
metab_2647	2.09996	2.21887	0.003776	0.05808	0.923305
(R)-3-hydroxybutyrylcarnitine	2.06579	2.25193	0.03218	0.2078	1.13701
metab_3757	2.01679	2.25816	0.001133	0.0271	1.07997
Beta-Alanyl-L-arginine	1.90765	2.25955	0.03083	0.2041	0.908677
6-(3-{8,8-dimethyl-2-oxo-2H,8H-pyrano[2,3-f]chromen-3-yl}-2-hydroxy-6-methoxyphenoxy)-3,4,5-trihydroxyoxane-2-carboxylic acid	2.09551	2.27233	0.0004876	0.01731	0.947732
metab_3741	2.08982	2.27439	0.0003468	0.01447	0.943537
metab_189	2.15338	2.28567	0.001856	0.03532	0.905503
metab_3708	2.12601	2.29061	0.0002831	0.0135	0.937402
metab_372	1.98453	2.29604	0.02317	0.1725	1.09396
metab_383	2.16813	2.29855	0.01446	0.1337	0.92452
metab_369	2.12828	2.30454	7.311e-05	0.009883	0.947376
metab_1525	2.22182	2.30774	0.008878	0.1048	0.898145
metab_3748	2.0476	2.31481	0.0003377	0.01447	0.939898
metab_2446	2.0254	2.31507	0.011	0.1184	0.892098
metab_1061	2.40076	2.32379	0.01355	0.13	1.12161
metab_2614	2.01574	2.33163	0.001515	0.03252	0.93339
metab_361	2.02374	2.33679	0.01867	0.1533	1.08943
N-Acetyl-L-Histidine	2.17569	2.34505	0.0001425	0.01019	0.947811
3-Hydroxy-4-aminopyridine	2.18306	2.35439	0.0001624	0.01019	0.940629
metab_605	2.13566	2.35445	0.0006217	0.01918	0.927539
metab_84	2.24337	2.3627	0.000816	0.0223	0.930629
metab_3455	2.20829	2.36568	0.009065	0.1062	0.895833
metab_416	2.31034	2.36641	0.00937	0.1094	0.911315
metab_1406	2.35662	2.36823	0.0132	0.1295	0.886122
Carnosine	2.15768	2.37302	2.834e-05	0.007757	0.95416
metab_2617	2.0476	2.37508	0.0009038	0.02351	0.933591
metab_388	2.35986	2.40798	0.006474	0.08506	0.909164
metab_3750	2.15231	2.41835	0.0003722	0.01526	0.932412
metab_1530	2.49255	2.41955	0.02156	0.1666	0.868096
metab_69	2.19762	2.42235	7.476e-05	0.009883	0.946496
metab_3698	2.21119	2.4283	2.833e-05	0.007757	0.944877
metab_161	2.28974	2.43192	0.002075	0.03835	1.09079
metab_390	2.17798	2.43308	0.0003034	0.01366	0.925224
metab_2649	2.23461	2.43309	0.001665	0.03369	0.917935
metab_66	2.31568	2.43729	0.005877	0.07914	0.885326
metab_2613	2.11174	2.44965	0.0006097	0.01918	0.93265
metab_2559	2.1362	2.46023	0.0001889	0.01079	0.933433
metab_2804	2.38291	2.46483	0.005624	0.07686	0.866577
metab_1562	2.1249	2.46508	0.0004756	0.01731	0.928113
metab_595	2.26306	2.4661	0.002948	0.04892	0.866818
Makaluvamine P	3.01029	2.47179	0.03534	0.2169	1.17446
metab_196	2.2047	2.47672	0.003184	0.05118	0.905302
metab_2520	2.45727	2.47912	0.01925	0.1563	0.866924
metab_2618	2.16077	2.48581	0.0006144	0.01918	0.923229
metab_2679	2.41348	2.48902	0.004243	0.06254	0.875489
PC(22:5(7Z,10Z,13Z,16Z,19Z)/P-16:0)	2.45729	2.49473	0.0149	0.1346	0.877605
metab_2605	2.15649	2.49601	0.0004652	0.0173	0.933239
metab_1552	2.44273	2.49849	0.01126	0.12	0.870218
metab_2	2.23417	2.50031	9.773e-05	0.009883	0.943558
metab_621	2.23288	2.50176	1.512e-05	0.007442	0.948161
metab_1550	2.13539	2.50306	0.002558	0.0457	0.896036
metab_2632	2.19194	2.51024	0.003796	0.05808	0.914645
metab_622	2.32088	2.51415	4.303e-05	0.008095	0.922137
metab_1340	2.2771	2.51977	0.007198	0.09134	1.11833
metab_2555	2.55229	2.52907	0.02142	0.1663	0.853755
metab_310	2.19511	2.53089	0.001732	0.03399	0.922332
metab_418	2.41718	2.54966	0.001224	0.02836	0.905779
metab_2630	2.43015	2.55034	0.00394	0.05972	0.87814
metab_1507	2.27838	2.55186	0.002762	0.04786	0.900971
metab_138	2.31758	2.5527	3.498e-05	0.007823	0.93035
Trans-3-Hydroxycotinine	2.23302	2.55416	0.005112	0.07202	0.899522
metab_366	2.28924	2.5694	0.0007353	0.02081	0.916768
metab_2619	2.38023	2.57869	0.005696	0.07751	0.879683
metab_303	2.26292	2.58453	0.001634	0.03351	0.907314
metab_1635	2.22853	2.60881	0.005514	0.07601	0.898141
metab_314	2.46817	2.64711	0.001967	0.0368	0.871016
metab_1318	2.48623	2.65163	0.001709	0.03385	0.867723
metab_322	2.47064	2.65396	0.001039	0.02557	0.890847
metab_2608	2.69902	2.66032	0.01305	0.1291	0.871203
metab_1560	2.58011	2.66382	0.004022	0.06039	0.885471
metab_1152	2.61727	2.66471	0.01228	0.1266	0.842624
Raltegravir	2.58979	2.66622	0.005545	0.07611	0.877335
metab_1557	2.31491	2.67566	0.0002031	0.01102	0.914224
metab_428	2.48185	2.69593	0.001652	0.03366	0.893339
metab_3541	2.39989	2.69695	9.785e-05	0.009883	0.909158
metab_3054	2.53114	2.70278	0.002302	0.04207	0.845707
metab_2550	2.35401	2.71294	0.0001593	0.01019	0.919662
metab_782	2.41599	2.71851	0.0002959	0.01365	0.901403
metab_3018	2.7147	2.74798	0.006602	0.08547	0.857662
metab_3205	2.79153	2.76889	0.01803	0.1512	0.7982
metab_1208	2.72847	2.78727	0.005221	0.07323	0.854528
metab_2636	2.70289	2.78887	0.001555	0.03272	0.862302
metab_202	2.45088	2.79628	0.006934	0.0887	0.886434
metab_2534	2.47469	2.80316	0.000716	0.02044	0.877193
metab_2584	2.43793	2.83059	0.0002812	0.0135	0.90371
metab_1566	2.7404	2.83569	0.004959	0.07018	0.850956
metab_1162	2.8117	2.85968	0.01366	0.13	0.80188
metab_1564	2.54748	2.86625	0.0001471	0.01019	0.896858
metab_3733	2.57465	2.86911	0.000618	0.01918	0.894766
metab_3019	2.8688	2.86959	0.009866	0.1119	0.83679
metab_194	2.49462	2.88121	0.000403	0.01591	0.901295
metab_3727	2.50448	2.88581	0.0006965	0.02025	0.897995
Sorbitane Monopalmitate	2.51346	2.89964	0.0002502	0.0125	0.912385
7-Dehydrocholesterol 5,6-oxide	2.80594	2.91357	0.005285	0.07381	0.841693
metab_171	2.91476	2.93682	0.009467	0.1097	0.827953
metab_1579	2.58624	2.97125	8.623e-05	0.009883	0.903629
metab_209	2.57897	2.9776	0.00274	0.04786	0.872008
N-Acetyl-D-Mannosamine	2.89503	2.99597	0.007736	0.09589	0.822411
metab_3034	2.98667	2.99827	0.01053	0.1171	0.838998
metab_2650	2.75529	2.99857	0.0009902	0.02494	0.862699
metab_1547	2.60971	3.0039	0.0005714	0.01907	0.880256
metab_707	2.67522	3.00779	1.578e-05	0.007442	0.853634
metab_2621	2.88234	3.01364	0.0009468	0.02442	0.844426
metab_1559	2.69428	3.01427	0.001715	0.03385	0.871162
4-oxo-5-phenylpentanoic acid	2.614	3.01953	0.002813	0.04786	0.851645
PS(18:4(6Z,9Z,12Z,15Z)/20:0)	3.00449	3.04306	0.01045	0.1171	0.844469
metab_1646	2.68785	3.07002	0.001532	0.03267	0.843027
metab_2553	2.70515	3.07422	0.0005784	0.01907	0.866601
metab_1537	2.67697	3.08191	0.0001553	0.01019	0.901061
metab_3603	2.96221	3.09359	0.002418	0.04345	0.808986
metab_1133	3.12186	3.1185	0.01311	0.1291	0.785358
metab_2468	2.69812	3.13389	0.0007454	0.02091	0.850743
metab_1478	3.02824	3.14967	0.005343	0.07429	0.822587
metab_3679	2.90851	3.15162	2.911e-05	0.007757	0.868318
metab_1615	2.76845	3.16075	0.002952	0.04892	0.831323
[(2S,3S,4R)-2-amino-3,4-dihydroxyoctadecyl] dihydrogen phosphate	2.95533	3.16412	0.006425	0.08491	1.22665
metab_2482	3.05115	3.17455	0.004111	0.06143	0.825952
metab_1594	3.00692	3.17657	0.001991	0.03701	0.836809
metab_2518	2.79851	3.19393	4.954e-05	0.008211	0.854218
metab_2753	3.02728	3.19469	0.002343	0.04234	0.83858
metab_1140	3.44622	3.24153	0.003076	0.05034	1.26285
metab_1565	2.78144	3.24511	0.001596	0.03292	0.824983
metab_3777	3.26312	3.24778	0.003218	0.05145	0.812697
metab_1614	2.85149	3.2486	0.004142	0.06161	0.830642
metab_2487	2.82194	3.24967	0.001136	0.0271	0.835566
metab_628	3.00994	3.27102	1.629e-05	0.007442	0.858271
metab_2777	3.07994	3.27573	0.003889	0.05922	0.81969
metab_199	2.86001	3.27766	0.0002482	0.0125	0.881836
Glucosylgalactosyl hydroxylysine	3.13993	3.28992	0.003498	0.0551	0.806775
metab_1513	2.99528	3.29809	0.0006505	0.01944	0.834652
metab_2827	3.13334	3.3191	0.001744	0.03399	0.785555
metab_2458	2.9447	3.321	0.001438	0.03129	0.836002
metab_2494	2.93606	3.3364	0.0001846	0.01079	0.862245
metab_1640	2.90761	3.33716	0.001499	0.0324	0.818564
metab_2497	2.90671	3.35099	0.0003484	0.01447	0.878428
metab_2637	2.94898	3.35484	0.0002033	0.01102	0.841823
7-Diethylamino-4-methylcoumarin	3.25391	3.46619	0.00101	0.02524	0.800163
3,6,9,12-Tetraoxatetracosan-1-ol	3.08603	3.50324	0.0001152	0.01019	0.842796
metab_2549	3.1096	3.51362	0.002157	0.03964	0.808643
metab_1450	3.31668	3.51874	0.001807	0.03481	0.795229
metab_218	3.10514	3.53827	0.0001216	0.01019	0.868229
metab_1620	3.11476	3.55425	0.0004311	0.01661	0.831545
metab_213	3.17074	3.60667	4.279e-05	0.008095	0.861327
4-Amino-6,7-dimethoxy-2-(1-piperazinyl)quinazoline	3.80673	3.63216	1.002e-05	0.007442	1.18184
Humulol	3.23172	3.67788	0.0001937	0.01086	0.86049
metab_180	3.4657	3.7179	0.000982	0.02492	0.825283
metab_1441	3.26671	3.71791	0.0001759	0.01061	0.866359
Isopentenyl-Adenosine-[d6]	3.27747	3.73052	0.0001156	0.01019	0.852669
3,4,5-trihydroxy-6-{3-hydroxy-4-[(2E)-3-phenylprop-2-en-1-yl]phenoxy}oxane-2-carboxylic acid	3.32778	3.78409	0.0002188	0.01166	0.806858
CocamidopropylBetaine	3.33998	3.79954	0.0001877	0.01079	0.85356
metab_3742	3.39359	3.80086	0.0004244	0.01655	0.826882
metab_1641	3.34859	3.80355	0.001684	0.03385	0.788061
metab_2516	3.36874	3.82579	0.0001051	0.009883	0.844587
metab_2491	3.38259	3.83961	0.0003928	0.01587	0.80135
PE-NMe2(9D3/9D3)	3.84599	3.86404	0.01674	0.1447	0.677771
Ectoine	3.83995	3.87069	2.687e-06	0.005328	1.24771
metab_1578	3.43202	3.92307	0.0003098	0.01376	0.809052
metab_382	3.76082	4.05439	0.0005754	0.01907	0.795491
metab_751	4.03021	4.05672	2.111e-05	0.007757	1.31111
metab_1087	3.84951	4.13731	0.0006748	0.0198	0.741942
metab_1535	3.64007	4.14519	5.312e-05	0.008211	0.782719
Phytyl diphosphate	3.67891	4.16574	0.0006239	0.01918	0.75625
3-Methoxycinnamic acid	3.70107	4.20795	9.368e-05	0.009883	0.791785
metab_3196	3.95259	4.23825	0.000501	0.01731	0.723001
metab_2539	3.7429	4.23881	0.0001488	0.01019	0.766162
metab_210	3.81297	4.33086	0.0001427	0.01019	0.759041
metab_2441	3.86284	4.35328	5.344e-05	0.008211	0.768578
metab_3377	4.13526	4.35879	0.000287	0.0135	1.36264
metab_205	3.86017	4.36855	0.0001043	0.009883	0.796773
metab_174	4.07281	4.41072	0.000149	0.01019	0.722696
metab_1638	3.95786	4.4544	1.442e-05	0.007442	0.756944
metab_204	3.9973	4.50605	7.751e-05	0.009883	0.771211
metab_2493	3.99186	4.50628	0.0001181	0.01019	0.767557
metab_2489	4.09146	4.5938	3.308e-05	0.007823	0.742427
metab_2451	4.07984	4.61622	3.669e-05	0.007823	0.750901
metab_2498	4.14596	4.69696	9.929e-05	0.009883	0.747543
metab_2792	4.21755	4.7442	2.489e-05	0.007757	0.757202
metab_1621	4.30568	4.85823	8.135e-05	0.009883	0.731874
metab_305	5.93429	6.69175	7.552e-05	0.009883	0.38401
